# Supplementary material for: Comparative gene expression study and pathway analysis of the human iris- and the retinal pigment epithelium
Source: PubMed Central journal article supplement (PMC5565104; doi:10.1371/journal.pone.0182983), 2017-08-21
Supplement: pone.0182983.s006.pdf [file pone.0182983.s006.pdf]

**QC Report - Agilent Technologies : 2 Color Gene Expression**

|            |                                     |                        |                          |
|------------|-------------------------------------|------------------------|--------------------------|
| Date       | Thursday, April 16, 2015 - 09:31    | BG Method              | No Background            |
| Image      | US12302316_251485079961_S01_H [1_1] | Background Detrend     | On(FeatNCRRange, LoPass) |
| Protocol   | GE2-v5_95_Feb07 (Read Only)         | Multiplicative Detrend | True                     |
| User Name  | bennis                              | Dye Norm               | Linear Lowess            |
| Grid       | 014850_D_20070207                   | Linear DyeNorm Factor  | 1.06(Red) 1.01(Green)    |
| FE Version | 9.5.3.1                             | Additive Error         | 4(Red)3(Green)           |
|            |                                     | Saturation Value       | 606400 (r), 586516 (g)   |

**Spot Finding of the Four Corners of the Array**

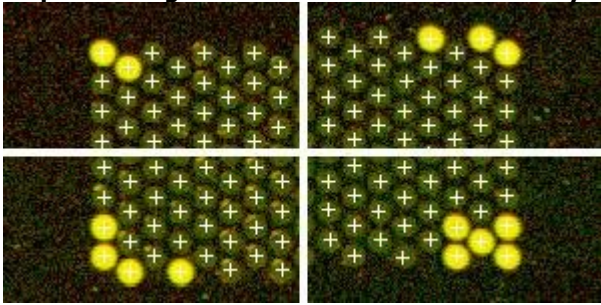

**Grid Normal**

| Feature | Local Background |       |     |       |
|---------|------------------|-------|-----|-------|
|         | Red              | Green | Red | Green |

|             |     |     |      |      |
|-------------|-----|-----|------|------|
| Non Uniform | 12  | 12  | 664  | 87   |
| Population  | 150 | 162 | 2198 | 1796 |

**Spatial Distribution of All Outliers on the Array**  
532 rows x 85 columns

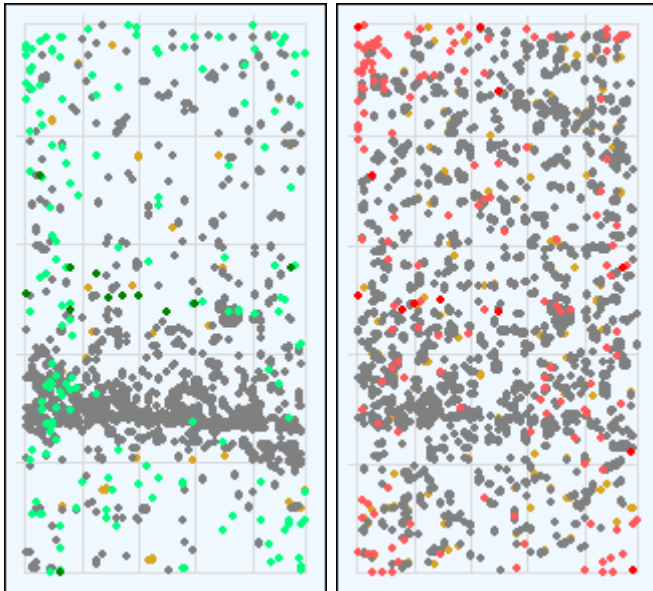

# FeatureNonUnif (Red or Green) = 18(0.04%)

# GeneNonUnif (Red or Green) = 15 (0.037 %)

- BG NonUniform      ● BG Population
- Red FeaturePopulation      ● Red Feature NonUniform
- Green FeaturePopulation      ● Green Feature NonUniform

**Negative Control Stats**

Red                      Green

|                     |       |       |
|---------------------|-------|-------|
| Average Net Signals | 47.47 | 44.84 |
| StdDev Net Signals  | 2.82  | 2.15  |

**Net Signal Statistics**

**Agilent SpikeIns:**

Red                      Green

|                      |     |    |
|----------------------|-----|----|
| # Saturated Features | 0   | 0  |
| 99% of Sig. Distrib. | 117 | 98 |
| 50% of Sig. Distrib. | 68  | 63 |
| 1% of Sig. Distrib.  | 50  | 49 |

**Non-Control probes:**

Red                      Green

|                      |        |       |
|----------------------|--------|-------|
| # Saturated Features | 4      | 0     |
| 99% of Sig. Distrib. | 217421 | 59317 |
| 50% of Sig. Distrib. | 577    | 805   |
| 1% of Sig. Distrib.  | 49     | 51    |

**Red and Green Background Corrected Signals (Non-Control Inliers)**

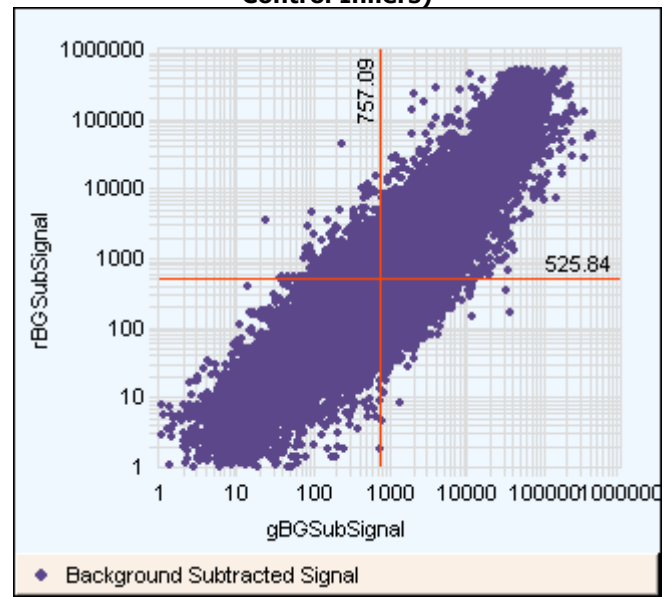

# Features (NonCtrl) with BGSUBSignals < 0: 771 (Red); 128 (Green)

|                       |       |       |
|-----------------------|-------|-------|
| Average BG Sub Signal | -3.86 | -2.83 |
| StdDev BG Sub Signal  | 2.73  | 1.99  |

**Local Bkg (inliers)**

Red Green

|        |       |       |
|--------|-------|-------|
| Number | 42653 | 43168 |
| Avg    | 47.18 | 33.44 |
| SD     | 3.63  | 2.45  |

**Foreground Surface Fit**

Red Green

|           |       |       |
|-----------|-------|-------|
| RMS_Fit   | 1.15  | 0.88  |
| RMS_Resid | 3.91  | 2.87  |
| Avg_Fit   | 68.51 | 64.34 |

**Reproducibility: %CV for Replicated Probes**

Median %CV Signal (inliers)

| Non-Control probes |       | Agilent SpikeIns |       |
|--------------------|-------|------------------|-------|
| Red                | Green | Red              | Green |

|                 |      |      |       |       |
|-----------------|------|------|-------|-------|
| BGSubSignal     | 6.39 | 6.26 | -1.00 | 15.37 |
| ProcessedSignal | 3.19 | 3.82 | -1.00 | 14.68 |

**Array Uniformity: LogRatios**

Non-Control Agilent SpikeIns

|                |       |      |
|----------------|-------|------|
| AbsAvgLogRatio | 0.27  | 0.19 |
| AverageS/N     | 21.88 | 1.96 |

**Sensitivity:Agilent SpikeIns - Ratio of Signal to Background for 2 dimmest probes**

(+)E1A\_r60\_n11 (+)E1A\_r60\_a97

| (g) | (r) | (g) | (r) |
|-----|-----|-----|-----|
| 2.1 | 1.7 | 1.1 | 1.2 |

**Spatial Distribution of Significantly Up-Regulated and Down-Regulated Features**

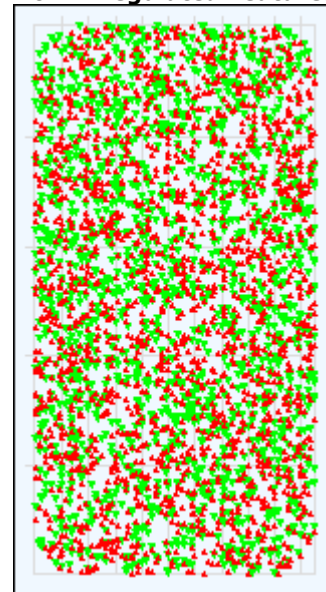

#Up-Regulated:11708 (Red) ; #Down-Regulated:10738 (Green)

▲ Up-Regulated □ Down-Regulated

**LogRatio Versus Log Processed Signal**

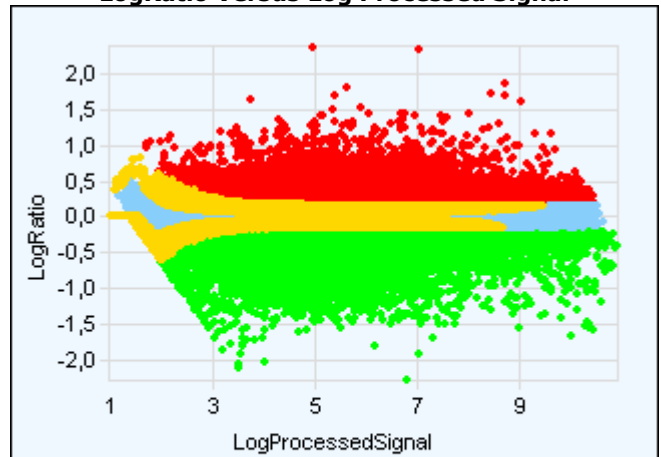

- Significantly down regulated
- Significantly up regulated
- Used to normalize
- Not differentially expressed

### Agilent SpikeIns Signal Statistics

| Probe Name      | Exp   | Obs  | SD   | S/N  |
|-----------------|-------|------|------|------|
| (+)E1A_r60_n9   | -1.00 | 0.08 | 0.19 | 0.43 |
| (+)E1A_r60_a107 | -0.48 | 0.14 | 0.14 | 1.04 |
| (+)E1A_r60_a135 | -0.48 | 0.15 | 0.22 | 0.67 |
| (+)E1A_r60_n11  | -0.48 | 0.40 | 0.07 | 5.76 |
| (+)E1A_r60_1    | 0.00  | 0.21 | 0.21 | 0.97 |
| (+)E1A_r60_a20  | 0.00  | 0.25 | 0.06 | 4.44 |
| (+)E1A_r60_3    | 0.48  | 0.14 | 0.07 | 2.09 |
| (+)E1A_r60_a104 | 0.48  | 0.34 | 0.20 | 1.71 |
| (+)E1A_r60_a97  | 0.48  | 0.08 | 0.19 | 0.40 |
| (+)E1A_r60_a22  | 1.00  | 0.12 | 0.06 | 2.06 |

### Agilent SpikeIns: % CV of Average BG Sub Signal

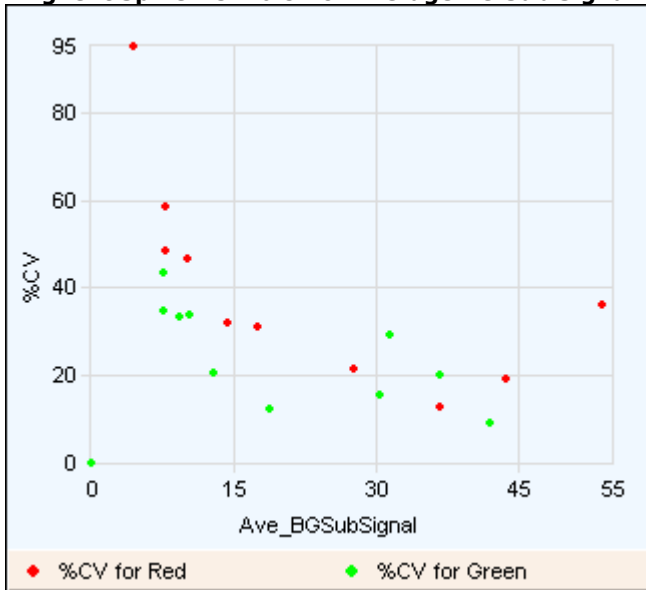

### Agilent SpikeIns: Expected LogRatio Vs Observed LogRatio

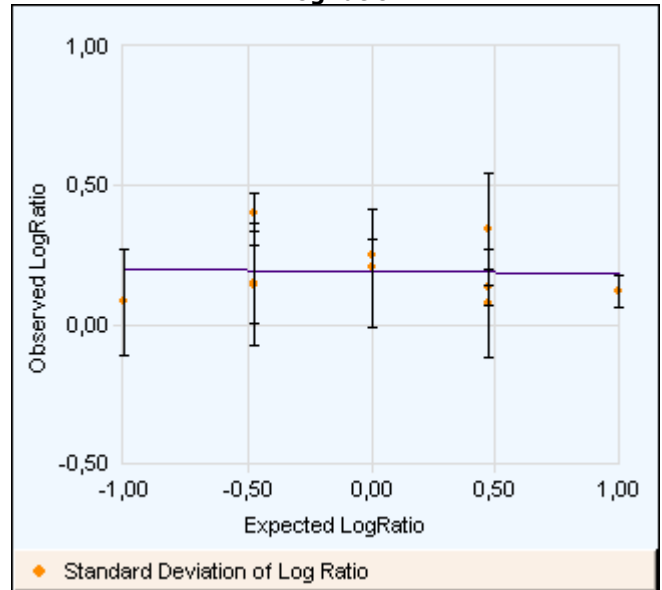

**QC Report - Agilent Technologies : 2 Color Gene Expression**

|            |                                     |                        |                          |
|------------|-------------------------------------|------------------------|--------------------------|
| Date       | Thursday, April 16, 2015 - 09:36    | BG Method              | No Background            |
| Image      | US12302316_251485079961_S01_H [1_2] | Background Detrend     | On(FeatNCRRange, LoPass) |
| Protocol   | GE2-v5_95_Feb07 (Read Only)         | Multiplicative Detrend | True                     |
| User Name  | bennis                              | Dye Norm               | Linear Lowess            |
| Grid       | 014850_D_20070207                   | Linear DyeNorm Factor  | 0.832(Red) 1.45(Green)   |
| FE Version | 9.5.3.1                             | Additive Error         | 4(Red)5(Green)           |
|            |                                     | Saturation Value       | 594427 (r), 585587 (g)   |

**Spot Finding of the Four Corners of the Array**

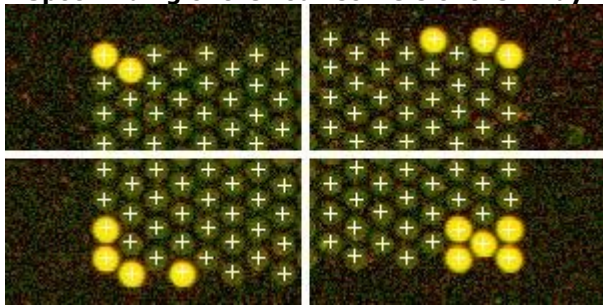

**Grid Normal**

| Feature | Local Background |       |
|---------|------------------|-------|
|         | Red              | Green |

|             | Red | Green | Red  | Green |
|-------------|-----|-------|------|-------|
| Non Uniform | 12  | 7     | 805  | 16    |
| Population  | 165 | 164   | 2044 | 938   |

**Spatial Distribution of All Outliers on the Array**  
532 rows x 85 columns

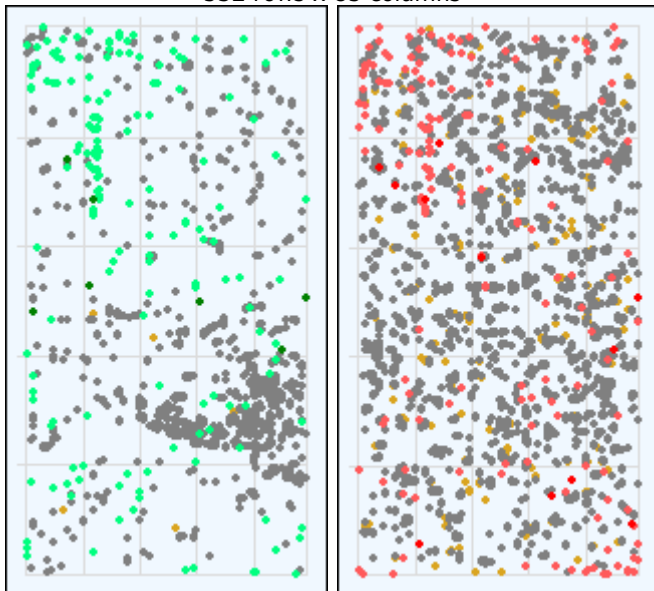

# FeatureNonUnif (Red or Green) = 16(0.04%)

# GeneNonUnif (Red or Green) = 14 (0.034 %)

- BG NonUniform      ● BG Population
- Red FeaturePopulation      ● Red Feature NonUniform
- Green FeaturePopulation      ● Green Feature NonUniform

**Negative Control Stats**

Red                      Green

|                     |       |       |
|---------------------|-------|-------|
| Average Net Signals | 50.20 | 45.62 |
| StdDev Net Signals  | 3.52  | 2.28  |

**Net Signal Statistics**

**Agilent SpikeIns:**

|                      | Red | Green |
|----------------------|-----|-------|
| # Saturated Features | 0   | 0     |
| 99% of Sig. Distrib. | 140 | 84    |
| 50% of Sig. Distrib. | 69  | 58    |
| 1% of Sig. Distrib.  | 51  | 48    |

**Non-Control probes:**

|                      | Red    | Green |
|----------------------|--------|-------|
| # Saturated Features | 9      | 0     |
| 99% of Sig. Distrib. | 270204 | 39473 |
| 50% of Sig. Distrib. | 791    | 636   |
| 1% of Sig. Distrib.  | 52     | 50    |

**Red and Green Background Corrected Signals (Non-Control Inliers)**

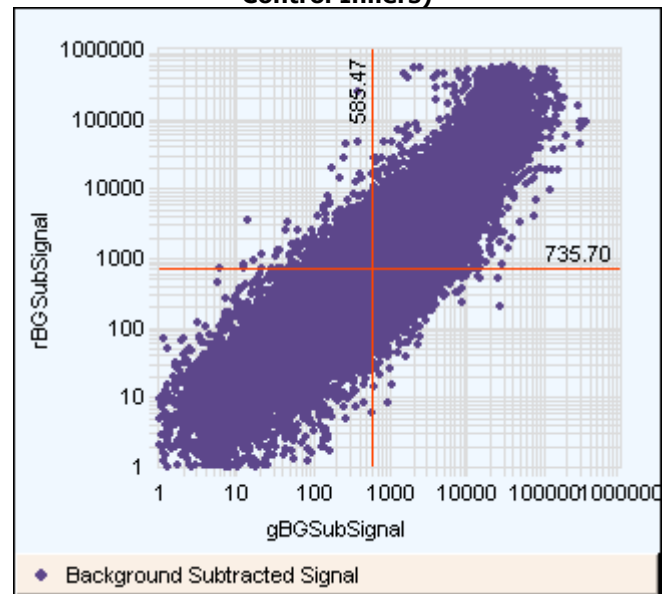

# Features (NonCtrl) with BGSUBSignals < 0: 870 (Red); 475 (Green)

|                       |       |       |
|-----------------------|-------|-------|
| Average BG Sub Signal | -5.14 | -4.78 |
| StdDev BG Sub Signal  | 3.42  | 2.28  |

**Local Bkg (inliers)**

Red Green

|        |       |       |
|--------|-------|-------|
| Number | 42766 | 44070 |
| Avg    | 48.81 | 35.02 |
| SD     | 3.91  | 2.09  |

**Foreground Surface Fit**

Red Green

|           |       |       |
|-----------|-------|-------|
| RMS_Fit   | 1.18  | 0.67  |
| RMS_Resid | 4.51  | 3.14  |
| Avg_Fit   | 72.53 | 67.04 |

**Reproducibility: %CV for Replicated Probes**

Median %CV Signal (inliers)

| Non-Control probes |       | Agilent SpikeIns |       |
|--------------------|-------|------------------|-------|
| Red                | Green | Red              | Green |

|                 |      |      |       |       |
|-----------------|------|------|-------|-------|
| BGSubSignal     | 8.32 | 7.89 | -1.00 | -1.00 |
| ProcessedSignal | 3.34 | 3.89 | -1.00 | -1.00 |

**Array Uniformity: LogRatios**

Non-Control Agilent SpikeIns

|                |       |      |
|----------------|-------|------|
| AbsAvgLogRatio | 0.30  | 0.17 |
| AverageS/N     | 25.67 | 1.76 |

**Sensitivity:Agilent SpikeIns - Ratio of Signal to Background for 2 dimmest probes**

(+)E1A\_r60\_n11 (+)E1A\_r60\_a97

| (g) | (r) | (g) | (r) |
|-----|-----|-----|-----|
| 2.2 | 1.4 | 1.0 | 1.0 |

**Spatial Distribution of Significantly Up-Regulated and Down-Regulated Features**

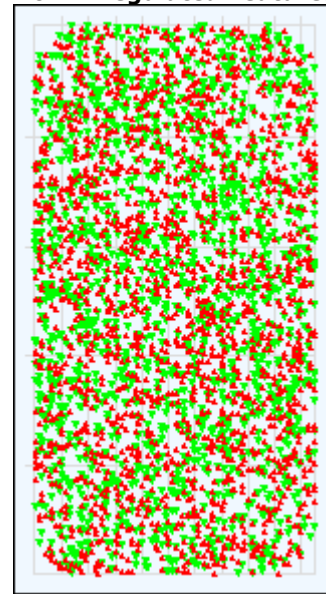

#Up-Regulated:12215 (Red) ; #Down-Regulated:11011 (Green)

▲ Up-Regulated □ Down-Regulated

**LogRatio Versus Log Processed Signal**

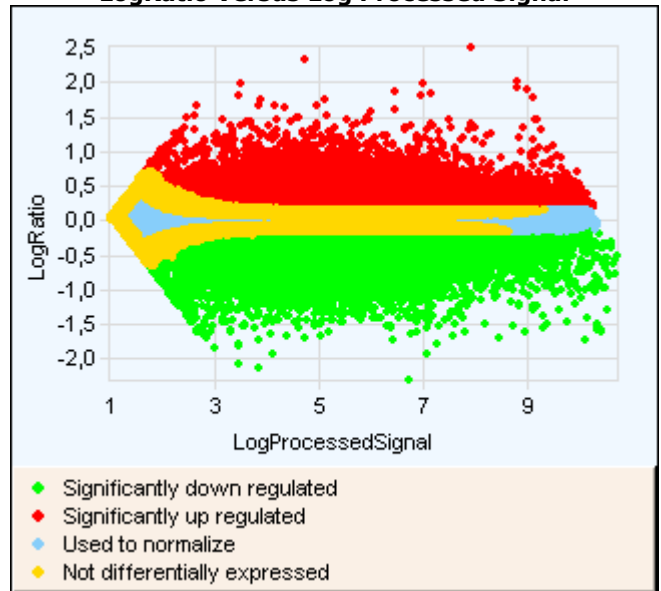

- Significantly down regulated
- Significantly up regulated
- Used to normalize
- Not differentially expressed

### Agilent SpikeIns Signal Statistics

| Probe Name      | Exp   | Obs   | SD   | S/N  |
|-----------------|-------|-------|------|------|
| (+)E1A_r60_n9   | -1.00 | 0.02  | 0.21 | 0.11 |
| (+)E1A_r60_a107 | -0.48 | 0.07  | 0.20 | 0.34 |
| (+)E1A_r60_a135 | -0.48 | 0.06  | 0.24 | 0.26 |
| (+)E1A_r60_n11  | -0.48 | 0.46  | 0.06 | 7.64 |
| (+)E1A_r60_1    | 0.00  | 0.31  | 0.17 | 1.76 |
| (+)E1A_r60_a20  | 0.00  | 0.19  | 0.08 | 2.39 |
| (+)E1A_r60_3    | 0.48  | 0.17  | 0.10 | 1.80 |
| (+)E1A_r60_a104 | 0.48  | 0.33  | 0.19 | 1.77 |
| (+)E1A_r60_a97  | 0.48  | -0.02 | 0.07 | 0.32 |
| (+)E1A_r60_a22  | 1.00  | 0.10  | 0.08 | 1.24 |

### Agilent SpikeIns: % CV of Average BG Sub Signal

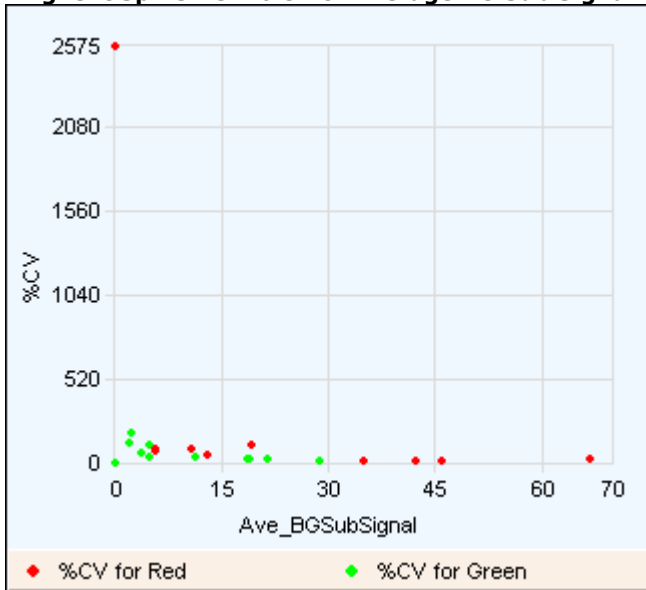

Median %CV: -1.00%(Red); -1.00%(Green)

### Agilent SpikeIns: Expected LogRatio Vs Observed LogRatio

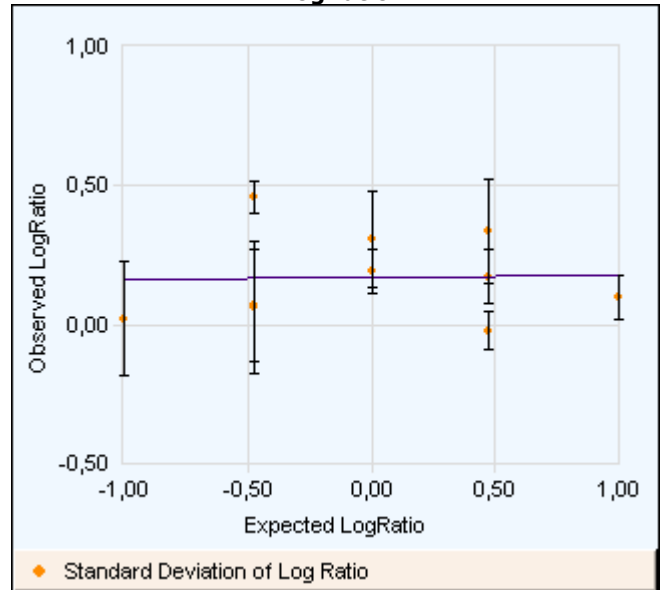

Y-Intercept = 0.170 ; Slope = 0.009 ; R<sup>2</sup> = 0.001

**QC Report - Agilent Technologies : 2 Color Gene Expression**

|            |                                     |                        |                          |
|------------|-------------------------------------|------------------------|--------------------------|
| Date       | Thursday, April 16, 2015 - 09:40    | BG Method              | No Background            |
| Image      | US12302316_251485079961_S01_H [1_3] | Background Detrend     | On(FeatNCRRange, LoPass) |
| Protocol   | GE2-v5_95_Feb07 (Read Only)         | Multiplicative Detrend | True                     |
| User Name  | bennis                              | Dye Norm               | Linear Lowess            |
| Grid       | 014850_D_20070207                   | Linear DyeNorm Factor  | 1.05(Red) 1.42(Green)    |
| FE Version | 9.5.3.1                             | Additive Error         | 4(Red)4(Green)           |
|            |                                     | Saturation Value       | 588507 (r), 585910 (g)   |

**Spot Finding of the Four Corners of the Array**

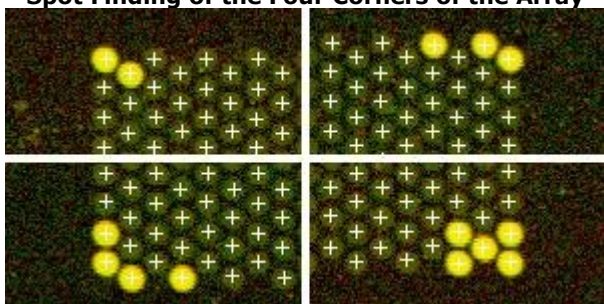

**Grid Normal**

| Feature | Local Background |       |
|---------|------------------|-------|
|         | Red              | Green |

|             | Red | Green | Red  | Green |
|-------------|-----|-------|------|-------|
| Non Uniform | 9   | 8     | 316  | 20    |
| Population  | 172 | 161   | 1661 | 768   |

**Spatial Distribution of All Outliers on the Array**  
532 rows x 85 columns

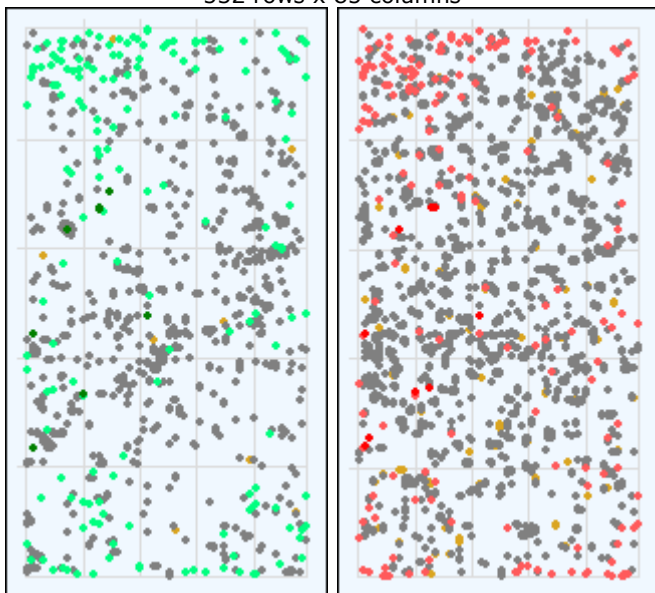

# FeatureNonUnif (Red or Green) = 11(0.02%)

# GeneNonUnif (Red or Green) = 11 (0.027 %)

- BG NonUniform      ● BG Population
- Red FeaturePopulation      ● Red Feature NonUniform
- Green FeaturePopulation      ● Green Feature NonUniform

**Negative Control Stats**

|                     | Red   | Green |
|---------------------|-------|-------|
| Average Net Signals | 46.93 | 47.55 |
| StdDev Net Signals  | 2.85  | 1.98  |

**Net Signal Statistics**

**Agilent SpikeIns:**

|                      | Red | Green |
|----------------------|-----|-------|
| # Saturated Features | 0   | 0     |
| 99% of Sig. Distrib. | 112 | 87    |
| 50% of Sig. Distrib. | 64  | 60    |
| 1% of Sig. Distrib.  | 46  | 49    |

**Non-Control probes:**

|                      | Red    | Green |
|----------------------|--------|-------|
| # Saturated Features | 4      | 0     |
| 99% of Sig. Distrib. | 213834 | 48595 |
| 50% of Sig. Distrib. | 678    | 649   |
| 1% of Sig. Distrib.  | 48     | 52    |

**Red and Green Background Corrected Signals (Non-Control Inliers)**

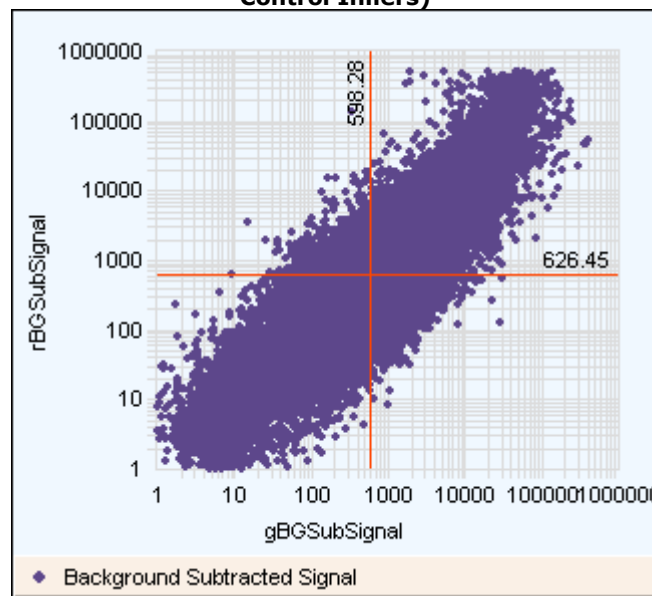

# Features (NonCtrl) with BGSubSignals < 0: 952 (Red); 312 (Green)

|                       |       |       |
|-----------------------|-------|-------|
| Average BG Sub Signal | -4.32 | -3.76 |
| StdDev BG Sub Signal  | 2.77  | 2.05  |

**Local Bkg (inliers)**

Red Green

|        |       |       |
|--------|-------|-------|
| Number | 43248 | 44235 |
| Avg    | 46.55 | 37.11 |
| SD     | 3.25  | 2.08  |

**Foreground Surface Fit**

Red Green

|           |       |       |
|-----------|-------|-------|
| RMS_Fit   | 1.12  | 0.52  |
| RMS_Resid | 3.76  | 2.78  |
| Avg_Fit   | 68.46 | 67.94 |

**Reproducibility: %CV for Replicated Probes**

Median %CV Signal (inliers)

| Non-Control probes |       | Agilent SpikeIns |       |
|--------------------|-------|------------------|-------|
| Red                | Green | Red              | Green |
|                    |       |                  |       |

|                 |      |      |       |       |
|-----------------|------|------|-------|-------|
| BGSubSignal     | 7.38 | 6.81 | -1.00 | -1.00 |
| ProcessedSignal | 3.21 | 3.59 | -1.00 | -1.00 |

**Array Uniformity: LogRatios**

Non-Control Agilent SpikeIns

|                |       |      |
|----------------|-------|------|
| AbsAvgLogRatio | 0.32  | 0.16 |
| AverageS/N     | 30.42 | 1.29 |

**Sensitivity:Agilent SpikeIns - Ratio of Signal to Background for 2 dimmest probes**

(+)E1A\_r60\_n11 (+)E1A\_r60\_a97

| (g) | (r) | (g) | (r) |
|-----|-----|-----|-----|
| 1.9 | 1.4 | 1.0 | 1.1 |

**Spatial Distribution of Significantly Up-Regulated and Down-Regulated Features**

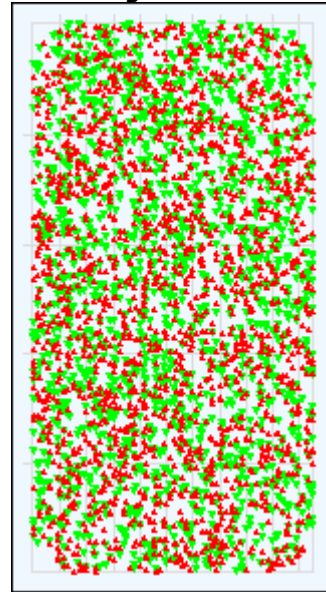

#Up-Regulated:12549 (Red) ; #Down-Regulated:11429 (Green)

▲ Up-Regulated □ Down-Regulated

**LogRatio Versus Log Processed Signal**

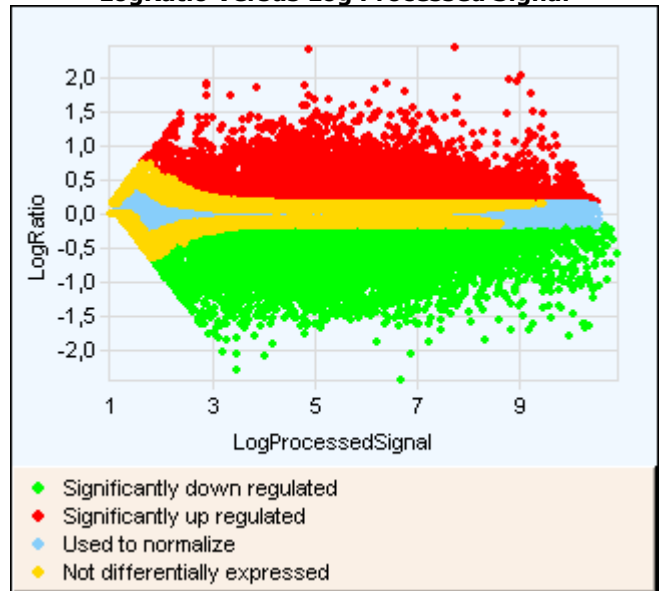

- Significantly down regulated
- Significantly up regulated
- Used to normalize
- Not differentially expressed



### Agilent SpikeIns Signal Statistics

| Probe Name      | Exp   | Obs   | SD   | S/N  |
|-----------------|-------|-------|------|------|
| (+)E1A_r60_n9   | -1.00 | -0.01 | 0.24 | 0.06 |
| (+)E1A_r60_a107 | -0.48 | 0.06  | 0.19 | 0.30 |
| (+)E1A_r60_a135 | -0.48 | 0.09  | 0.23 | 0.41 |
| (+)E1A_r60_n11  | -0.48 | 0.35  | 0.12 | 2.80 |
| (+)E1A_r60_1    | 0.00  | 0.20  | 0.20 | 1.01 |
| (+)E1A_r60_a20  | 0.00  | 0.24  | 0.08 | 3.08 |
| (+)E1A_r60_3    | 0.48  | 0.18  | 0.08 | 2.34 |
| (+)E1A_r60_a104 | 0.48  | 0.35  | 0.22 | 1.56 |
| (+)E1A_r60_a97  | 0.48  | -0.04 | 0.10 | 0.36 |
| (+)E1A_r60_a22  | 1.00  | 0.06  | 0.06 | 0.97 |

### Agilent SpikeIns: % CV of Average BG Sub Signal

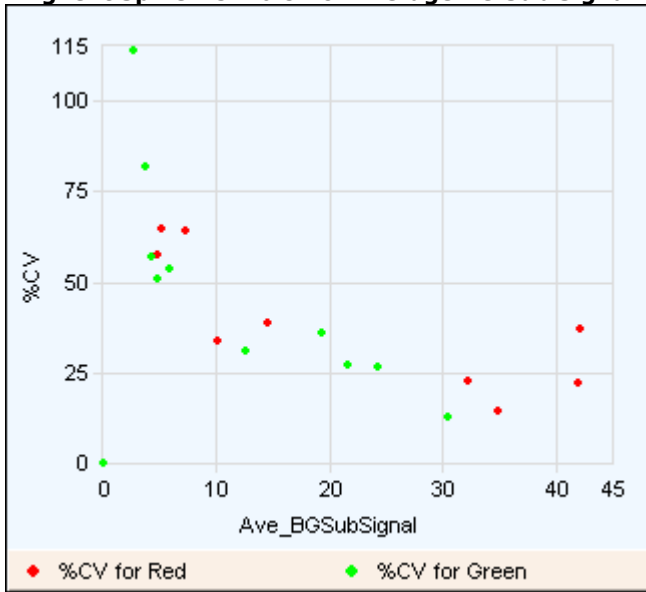

Median %CV: -1.00%(Red); -1.00%(Green)

### Agilent SpikeIns: Expected LogRatio Vs Observed LogRatio

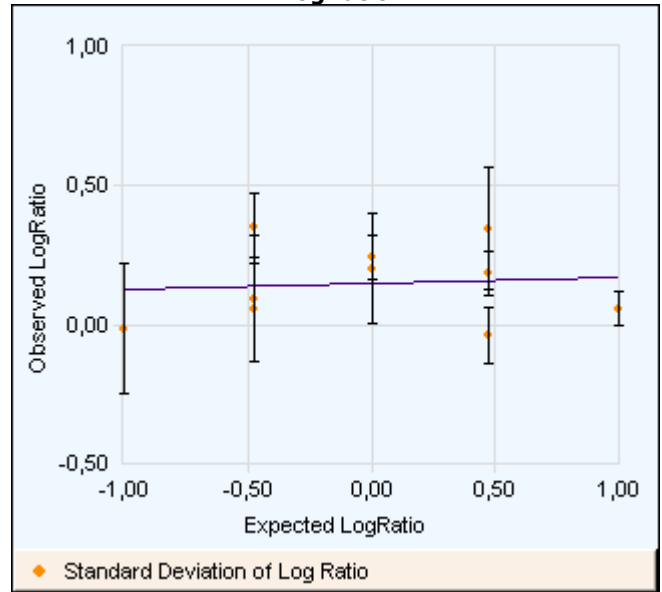

Y-Intercept = 0.148 ; Slope = 0.021 ;  $R^2 = 0.008$

**QC Report - Agilent Technologies : 2 Color Gene Expression**

|            |                                     |                        |                          |
|------------|-------------------------------------|------------------------|--------------------------|
| Date       | Thursday, April 16, 2015 - 09:44    | BG Method              | No Background            |
| Image      | US12302316_251485079961_S01_H [1_4] | Background Detrend     | On(FeatNCRRange, LoPass) |
| Protocol   | GE2-v5_95_Feb07 (Read Only)         | Multiplicative Detrend | True                     |
| User Name  | bennis                              | Dye Norm               | Linear Lowess            |
| Grid       | 014850_D_20070207                   | Linear DyeNorm Factor  | 0.967(Red) 1.42(Green)   |
| FE Version | 9.5.3.1                             | Additive Error         | 4(Red)5(Green)           |
|            |                                     | Saturation Value       | 588298 (r), 585172 (g)   |

**Spot Finding of the Four Corners of the Array**

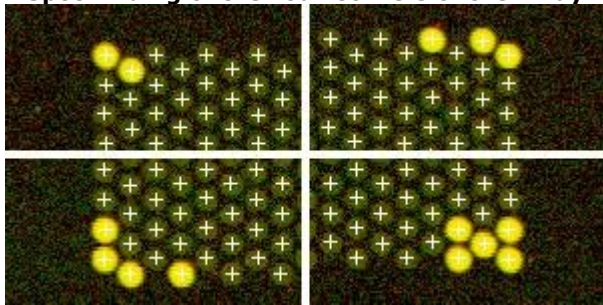

**Grid Normal**

| Feature | Local Background |       |     |       |
|---------|------------------|-------|-----|-------|
|         | Red              | Green | Red | Green |

|             |     |     |      |     |
|-------------|-----|-----|------|-----|
| Non Uniform | 11  | 11  | 402  | 21  |
| Population  | 206 | 252 | 1780 | 773 |

**Spatial Distribution of All Outliers on the Array**  
532 rows x 85 columns

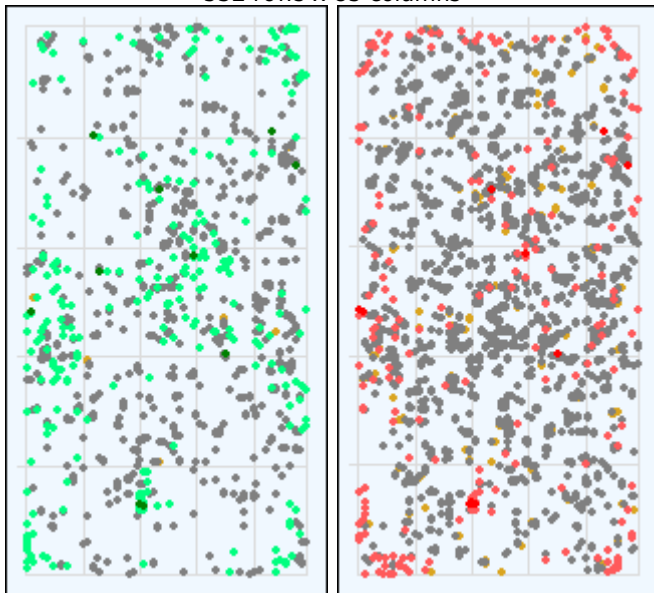

# FeatureNonUnif (Red or Green) = 13(0.03%)

# GeneNonUnif (Red or Green) = 13 (0.032 %)

- BG NonUniform      ● BG Population
- Red FeaturePopulation      ● Red Feature NonUniform
- Green FeaturePopulation      ● Green Feature NonUniform

**Negative Control Stats**

|                     | Red   | Green |
|---------------------|-------|-------|
| Average Net Signals | 48.64 | 48.38 |
| StdDev Net Signals  | 3.92  | 2.56  |

**Net Signal Statistics**

**Agilent SpikeIns:**

|                      | Red | Green |
|----------------------|-----|-------|
| # Saturated Features | 0   | 0     |
| 99% of Sig. Distrib. | 130 | 106   |
| 50% of Sig. Distrib. | 69  | 63    |
| 1% of Sig. Distrib.  | 47  | 51    |

**Non-Control probes:**

|                      | Red    | Green |
|----------------------|--------|-------|
| # Saturated Features | 8      | 0     |
| 99% of Sig. Distrib. | 216726 | 44017 |
| 50% of Sig. Distrib. | 710    | 627   |
| 1% of Sig. Distrib.  | 50     | 53    |

**Red and Green Background Corrected Signals (Non-Control Inliers)**

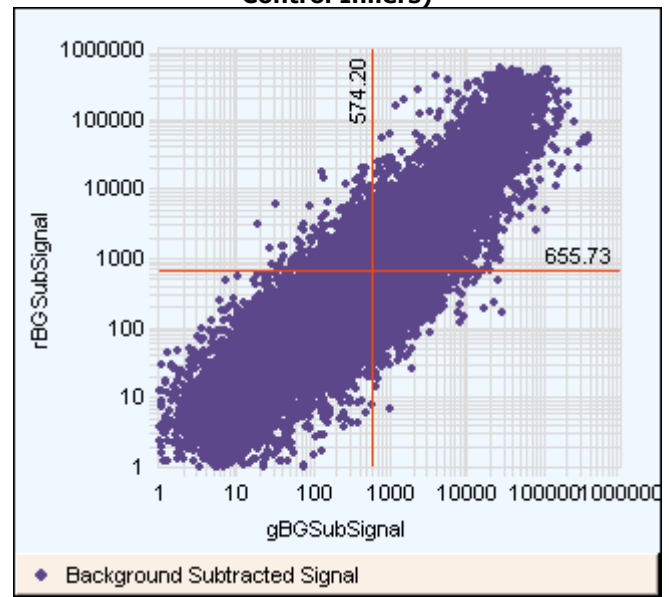

# Features (NonCtrl) with BGSUBSignals < 0: 865 (Red); 416 (Green)

|                       |       |       |
|-----------------------|-------|-------|
| Average BG Sub Signal | -4.95 | -5.04 |
| StdDev BG Sub Signal  | 3.63  | 2.50  |

**Local Bkg (inliers)**

Red Green

|        |       |       |
|--------|-------|-------|
| Number | 43098 | 44230 |
| Avg    | 46.49 | 37.46 |
| SD     | 3.30  | 2.00  |

**Foreground Surface Fit**

Red Green

|           |       |       |
|-----------|-------|-------|
| RMS_Fit   | 1.56  | 1.16  |
| RMS_Resid | 4.64  | 3.28  |
| Avg_Fit   | 70.83 | 70.06 |

**Reproducibility: %CV for Replicated Probes**

Median %CV Signal (inliers)

Non-Control probes Agilent SpikeIns

Red Green Red Green

|                 |      |      |       |       |
|-----------------|------|------|-------|-------|
| BGSubSignal     | 6.51 | 5.67 | -1.00 | -1.00 |
| ProcessedSignal | 4.04 | 4.48 | -1.00 | -1.00 |

**Array Uniformity: LogRatios**

Non-Control Agilent SpikeIns

|                |       |      |
|----------------|-------|------|
| AbsAvgLogRatio | 0.29  | 0.18 |
| AverageS/N     | 21.10 | 1.47 |

**Sensitivity:Agilent SpikeIns - Ratio of Signal to Background for 2 dimmest probes**

(+)E1A\_r60\_n11 (+)E1A\_r60\_a97

| (g) | (r) | (g) | (r) |
|-----|-----|-----|-----|
| 2.1 | 1.3 | 1.0 | 1.0 |

**Spatial Distribution of Significantly Up-Regulated and Down-Regulated Features**

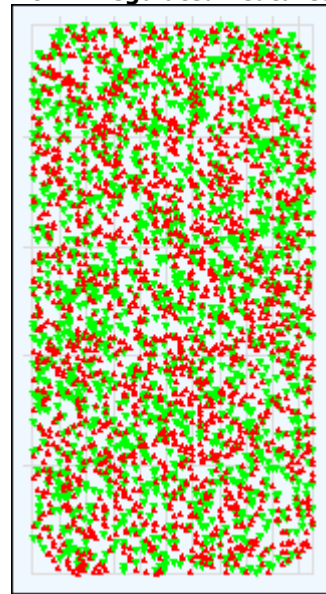

#Up-Regulated:11738 (Red) ; #Down-Regulated:10656 (Green)

▲ Up-Regulated □ Down-Regulated

**LogRatio Versus Log Processed Signal**

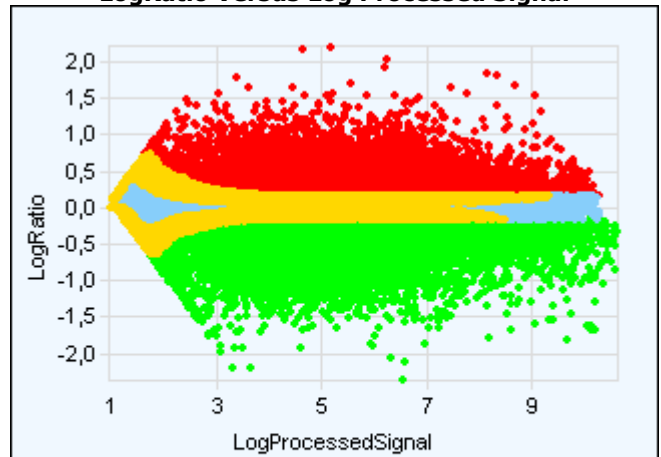

- Significantly down regulated
- Significantly up regulated
- Used to normalize
- Not differentially expressed

### Agilent SpikeIns Signal Statistics

| Probe Name      | Exp   | Obs   | SD   | S/N  |
|-----------------|-------|-------|------|------|
| (+)E1A_r60_n9   | -1.00 | 0.03  | 0.22 | 0.13 |
| (+)E1A_r60_a107 | -0.48 | 0.11  | 0.14 | 0.74 |
| (+)E1A_r60_a135 | -0.48 | 0.11  | 0.20 | 0.55 |
| (+)E1A_r60_n11  | -0.48 | 0.40  | 0.09 | 4.34 |
| (+)E1A_r60_1    | 0.00  | 0.25  | 0.21 | 1.18 |
| (+)E1A_r60_a20  | 0.00  | 0.20  | 0.06 | 3.41 |
| (+)E1A_r60_3    | 0.48  | 0.15  | 0.10 | 1.48 |
| (+)E1A_r60_a104 | 0.48  | 0.40  | 0.22 | 1.84 |
| (+)E1A_r60_a97  | 0.48  | -0.05 | 0.21 | 0.22 |
| (+)E1A_r60_a22  | 1.00  | 0.08  | 0.10 | 0.83 |

### Agilent SpikeIns: % CV of Average BG Sub Signal

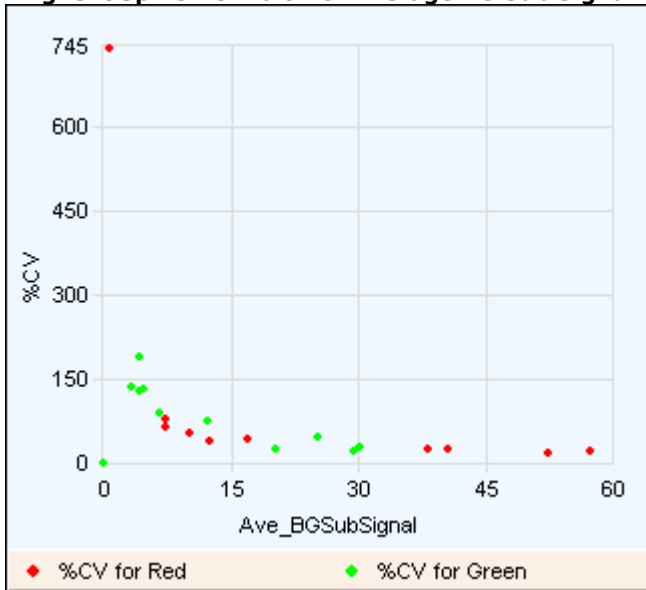

Median %CV: -1.00%(Red); -1.00%(Green)

### Agilent SpikeIns: Expected LogRatio Vs Observed LogRatio

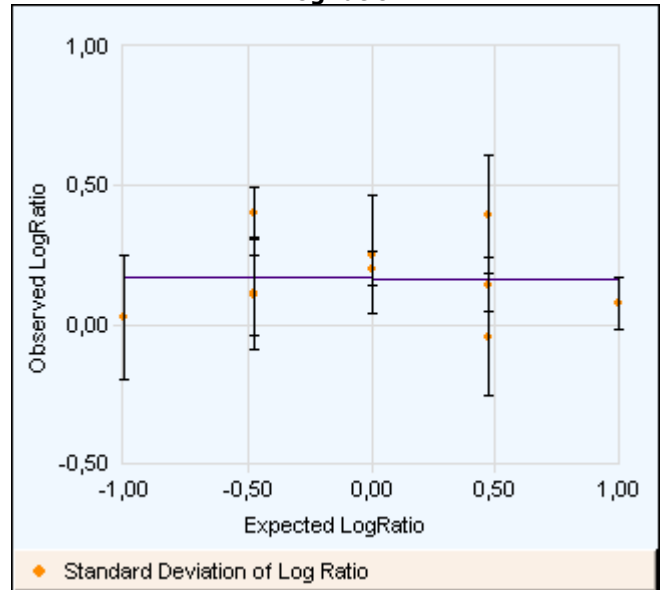

Y-Intercept = 0.168 ; Slope = -0.003 ; R<sup>2</sup> = 0.000

**QC Report - Agilent Technologies : 2 Color Gene Expression**

|            |                                     |                        |                          |
|------------|-------------------------------------|------------------------|--------------------------|
| Date       | Thursday, April 16, 2015 - 11:23    | BG Method              | No Background            |
| Image      | US12302316_251485079963_S01_H [1_2] | Background Detrend     | On(FeatNCRRange, LoPass) |
| Protocol   | GE2-v5_95_Feb07 (Read Only)         | Multiplicative Detrend | True                     |
| User Name  | bennis                              | Dye Norm               | Linear Lowess            |
| Grid       | 014850_D_20070207                   | Linear DyeNorm Factor  | 2.4(Red) 1.1(Green)      |
| FE Version | 9.5.3.1                             | Additive Error         | 5(Red)2(Green)           |
|            |                                     | Saturation Value       | 569872 (r), 587750 (g)   |

**Spot Finding of the Four Corners of the Array**

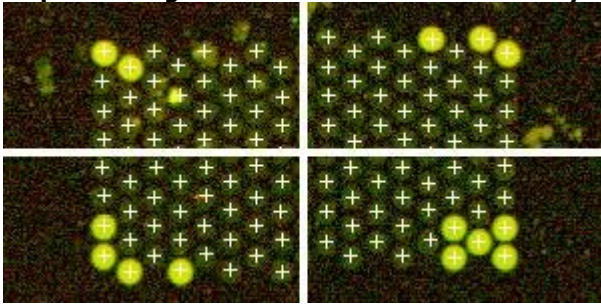

**Grid Normal**

| Feature | Local Background |       |
|---------|------------------|-------|
|         | Red              | Green |

|                        | Red | Green | Red  | Green |
|------------------------|-----|-------|------|-------|
| Non Uniform Population | 19  | 18    | 28   | 85    |
| Population             | 119 | 173   | 1046 | 757   |

**Spatial Distribution of All Outliers on the Array**  
532 rows x 85 columns

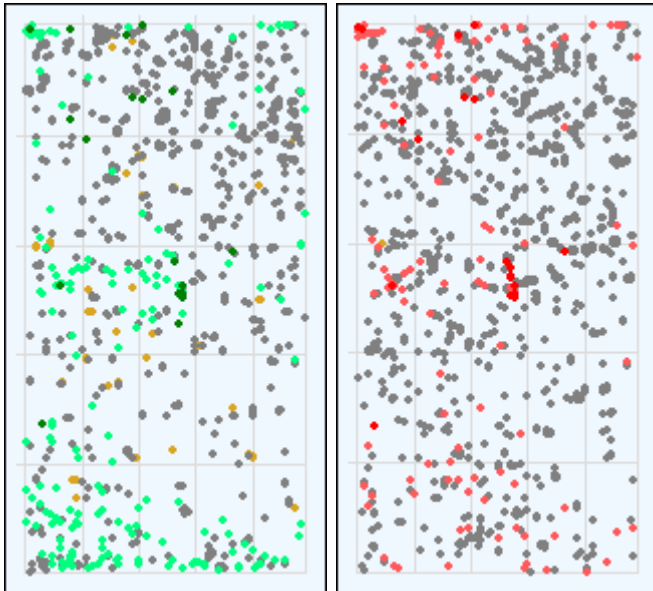

# FeatureNonUnif (Red or Green) = 22(0.05%)

# GeneNonUnif (Red or Green) = 20 (0.049 %)

- BG NonUniform      ● BG Population
- Red FeaturePopulation      ● Red Feature NonUniform
- Green FeaturePopulation      ● Green Feature NonUniform

**Negative Control Stats**

|                     | Red   | Green |
|---------------------|-------|-------|
| Average Net Signals | 34.32 | 33.56 |
| StdDev Net Signals  | 2.19  | 3.06  |

**Net Signal Statistics**

**Agilent SpikeIns:**

|                      | Red | Green |
|----------------------|-----|-------|
| # Saturated Features | 0   | 0     |
| 99% of Sig. Distrib. | 65  | 74    |
| 50% of Sig. Distrib. | 39  | 44    |
| 1% of Sig. Distrib.  | 31  | 32    |

**Non-Control probes:**

|                      | Red   | Green |
|----------------------|-------|-------|
| # Saturated Features | 0     | 0     |
| 99% of Sig. Distrib. | 51943 | 53513 |
| 50% of Sig. Distrib. | 165   | 443   |
| 1% of Sig. Distrib.  | 33    | 36    |

**Red and Green Background Corrected Signals (Non-Control Inliers)**

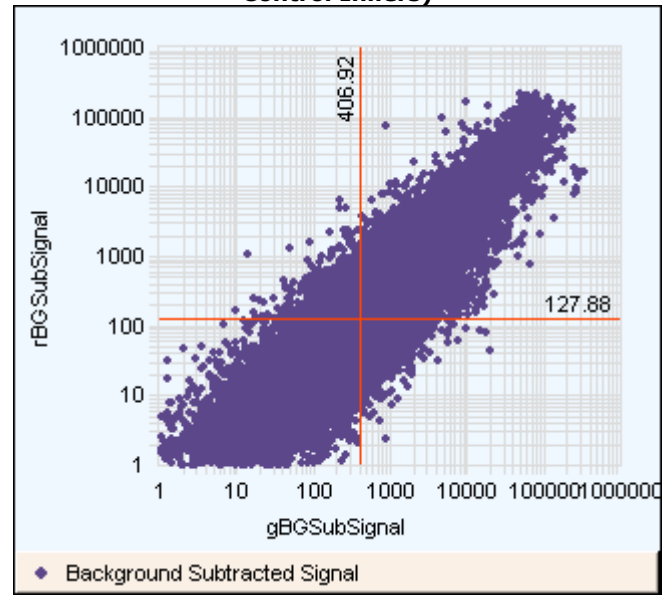

# Features (NonCtrl) with BGSubSignals < 0: 1563 (Red); 342 (Green)

|                       |       |       |
|-----------------------|-------|-------|
| Average BG Sub Signal | -2.11 | -2.67 |
| StdDev BG Sub Signal  | 1.65  | 1.90  |

**Local Bkg (inliers)**

Red Green

|        |       |       |
|--------|-------|-------|
| Number | 43968 | 44211 |
| Avg    | 42.72 | 31.47 |
| SD     | 2.37  | 1.98  |

**Foreground Surface Fit**

Red Green

|           |       |       |
|-----------|-------|-------|
| RMS_Fit   | 1.48  | 2.45  |
| RMS_Resid | 1.99  | 2.13  |
| Avg_Fit   | 53.48 | 53.32 |

**Reproducibility: %CV for Replicated Probes**

Median %CV Signal (inliers)

Non-Control probes Agilent SpikeIns

Red Green Red Green

|                 |       |      |       |       |
|-----------------|-------|------|-------|-------|
| BGSubSignal     | 26.88 | 8.50 | -1.00 | -1.00 |
| ProcessedSignal | 6.31  | 3.95 | -1.00 | -1.00 |

**Array Uniformity: LogRatios**

Non-Control Agilent SpikeIns

|                |       |      |
|----------------|-------|------|
| AbsAvgLogRatio | 0.26  | 0.10 |
| AverageS/N     | 10.84 | 0.55 |

**Sensitivity:Agilent SpikeIns - Ratio of Signal to Background for 2 dimmest probes**

(+)E1A\_r60\_n11 (+)E1A\_r60\_a97

|            |            |            |            |
|------------|------------|------------|------------|
| <b>(g)</b> | <b>(r)</b> | <b>(g)</b> | <b>(r)</b> |
| 1.3        | 1.4        | 1.0        | 1.0        |

**Spatial Distribution of Significantly Up-Regulated and Down-Regulated Features**

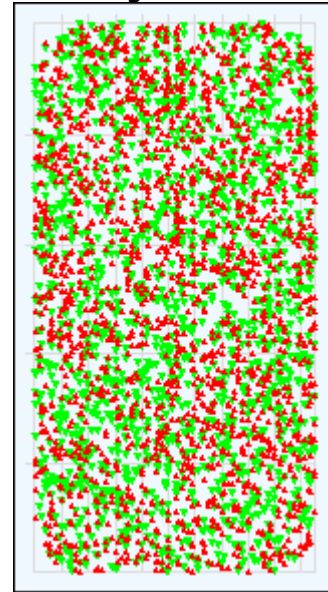

#Up-Regulated:10518 (Red) ; #Down-Regulated:9873 (Green)

▲ Up-Regulated □ Down-Regulated

**LogRatio Versus Log Processed Signal**

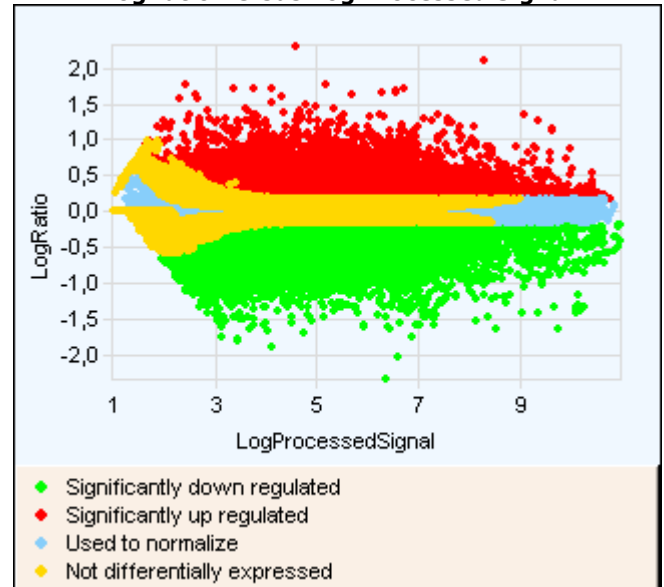

### Agilent SpikeIns Signal Statistics

| Probe Name      | Exp   | Obs   | SD   | S/N  |
|-----------------|-------|-------|------|------|
| (+)E1A_r60_n9   | -1.00 | 0.07  | 0.18 | 0.40 |
| (+)E1A_r60_a107 | -0.48 | 0.03  | 0.21 | 0.12 |
| (+)E1A_r60_a135 | -0.48 | 0.09  | 0.20 | 0.45 |
| (+)E1A_r60_n11  | -0.48 | 0.38  | 0.16 | 2.41 |
| (+)E1A_r60_1    | 0.00  | 0.07  | 0.20 | 0.37 |
| (+)E1A_r60_a20  | 0.00  | -0.01 | 0.15 | 0.09 |
| (+)E1A_r60_3    | 0.48  | 0.09  | 0.20 | 0.46 |
| (+)E1A_r60_a104 | 0.48  | 0.16  | 0.26 | 0.62 |
| (+)E1A_r60_a97  | 0.48  | 0.04  | 0.12 | 0.29 |
| (+)E1A_r60_a22  | 1.00  | 0.05  | 0.20 | 0.26 |

### Agilent SpikeIns: % CV of Average BG Sub Signal

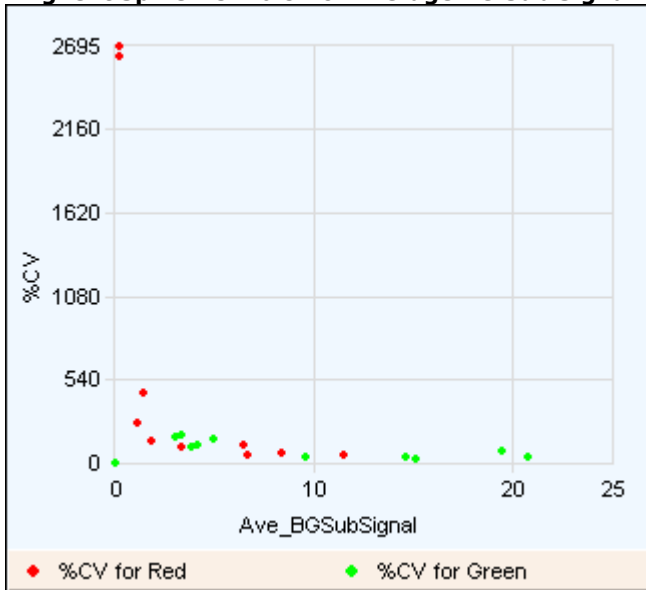

Median %CV: -1.00%(Red); -1.00%(Green)

### Agilent SpikeIns: Expected LogRatio Vs Observed LogRatio

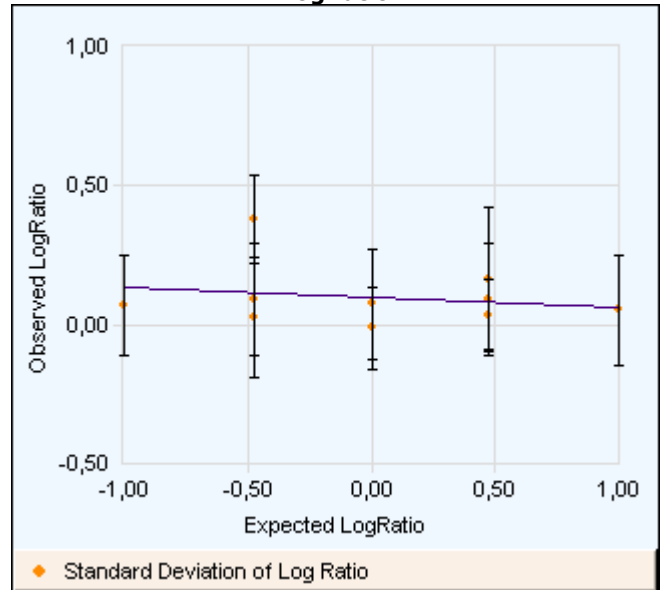

Y-Intercept = 0.097 ; Slope = -0.035 ;  $R^2 = 0.037$

Human Retinal Pigment Epithelium Sample 1

**QC Report - Agilent Technologies : 2 Color Gene Expression**

|            |                                     |                        |                          |
|------------|-------------------------------------|------------------------|--------------------------|
| Date       | Thursday, April 16, 2015 - 09:35    | BG Method              | No Background            |
| Image      | US12302316_251485079962_S01_H [1_2] | Background Detrend     | On(FeatNCRRange, LoPass) |
| Protocol   | GE2-v5_95_Feb07 (Read Only)         | Multiplicative Detrend | True                     |
| User Name  | bennis                              | Dye Norm               | Linear Lowess            |
| Grid       | 014850_D_20070207                   | Linear DyeNorm Factor  | 1.82(Red) 1.17(Green)    |
| FE Version | 9.5.3.1                             | Additive Error         | 7(Red)4(Green)           |
|            |                                     | Saturation Value       | 593997 (r), 584507 (g)   |

**Spot Finding of the Four Corners of the Array**

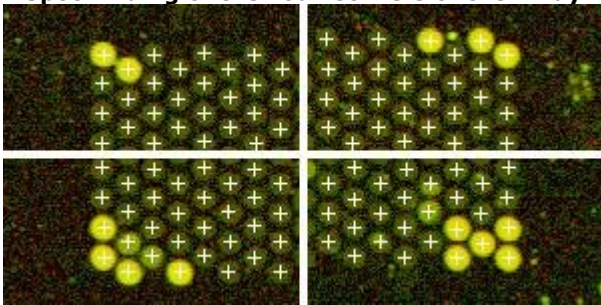

**Grid Normal**

| Feature | Local Background |       |     |       |
|---------|------------------|-------|-----|-------|
|         | Red              | Green | Red | Green |

|             |     |     |      |      |
|-------------|-----|-----|------|------|
| Non Uniform | 144 | 226 | 88   | 92   |
| Population  | 208 | 184 | 1476 | 1327 |

**Spatial Distribution of All Outliers on the Array**  
532 rows x 85 columns

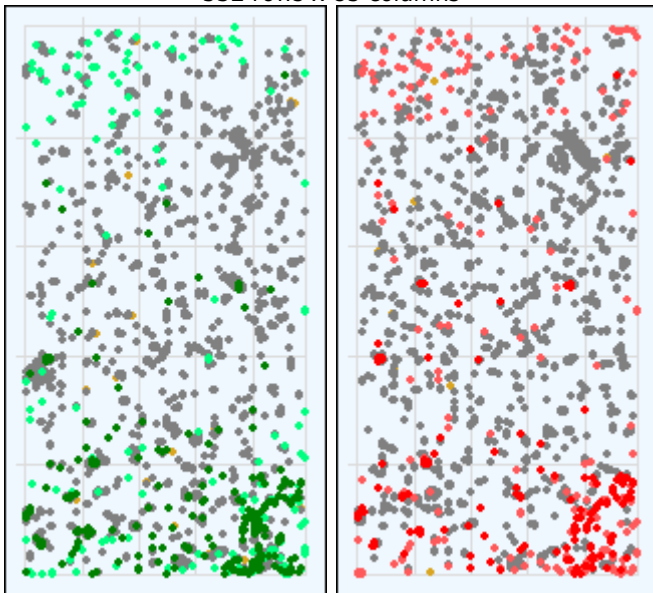

# FeatureNonUnif (Red or Green) = 251(0.56%)

# GeneNonUnif (Red or Green) = 217 (0.529 %)

- BG NonUniform      ● BG Population
- Red FeaturePopulation      ● Red Feature NonUniform
- Green FeaturePopulation      ● Green Feature NonUniform

**Negative Control Stats**

Red      Green

|                     |       |       |
|---------------------|-------|-------|
| Average Net Signals | 43.03 | 48.27 |
| StdDev Net Signals  | 3.00  | 2.74  |

**Net Signal Statistics**

**Agilent SpikeIns:**

Red      Green

|                      |     |     |
|----------------------|-----|-----|
| # Saturated Features | 0   | 0   |
| 99% of Sig. Distrib. | 186 | 295 |
| 50% of Sig. Distrib. | 75  | 71  |
| 1% of Sig. Distrib.  | 46  | 52  |

**Non-Control probes:**

Red      Green

|                      |       |       |
|----------------------|-------|-------|
| # Saturated Features | 0     | 0     |
| 99% of Sig. Distrib. | 48738 | 65226 |
| 50% of Sig. Distrib. | 285   | 509   |
| 1% of Sig. Distrib.  | 48    | 54    |

**Red and Green Background Corrected Signals (Non-Control Inliers)**

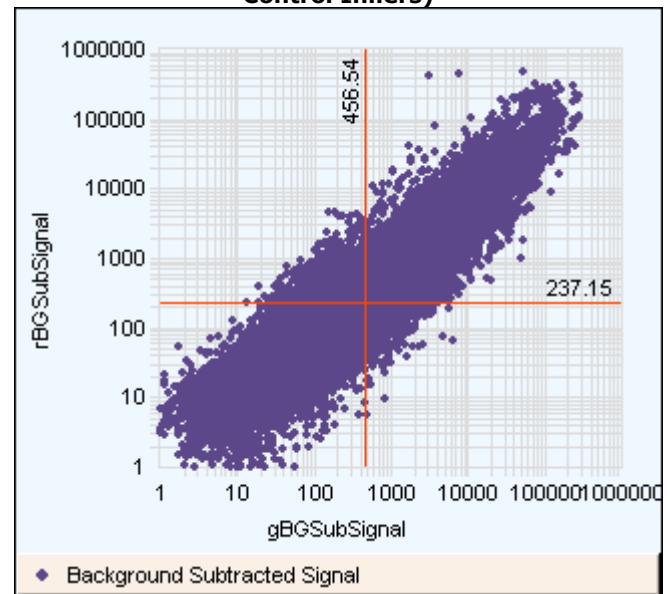

# Features (NonCtrl) with BGSubSignals < 0: 437 (Red); 276 (Green)



|                       |       |       |
|-----------------------|-------|-------|
| Average BG Sub Signal | -5.08 | -4.03 |
| StdDev BG Sub Signal  | 2.67  | 2.50  |

**Local Bkg (inliers)**

Red Green

|        |       |       |
|--------|-------|-------|
| Number | 43527 | 43668 |
| Avg    | 41.03 | 35.32 |
| SD     | 2.19  | 1.94  |

**Foreground Surface Fit**

Red Green

|           |       |       |
|-----------|-------|-------|
| RMS_Fit   | 1.36  | 1.25  |
| RMS_Resid | 4.09  | 3.16  |
| Avg_Fit   | 64.47 | 69.02 |

**Reproducibility: %CV for Replicated Probes**

Median %CV Signal (inliers)

Non-Control probes Agilent SpikeIns

Red Green Red Green

|                 |       |       |       |       |
|-----------------|-------|-------|-------|-------|
| BGSubSignal     | 13.82 | 12.96 | -1.00 | -1.00 |
| ProcessedSignal | 5.31  | 4.97  | -1.00 | -1.00 |

**Array Uniformity: LogRatios**

Non-Control Agilent SpikeIns

|                |       |      |
|----------------|-------|------|
| AbsAvgLogRatio | 0.27  | 0.18 |
| AverageS/N     | 16.09 | 1.92 |

**Sensitivity:Agilent SpikeIns - Ratio of Signal to Background for 2 dimmest probes**

(+)E1A\_r60\_n11 (+)E1A\_r60\_a97

|            |            |            |            |
|------------|------------|------------|------------|
| <b>(g)</b> | <b>(r)</b> | <b>(g)</b> | <b>(r)</b> |
| 1.7        | 1.4        | 1.5        | 1.3        |

**Spatial Distribution of Significantly Up-Regulated and Down-Regulated Features**

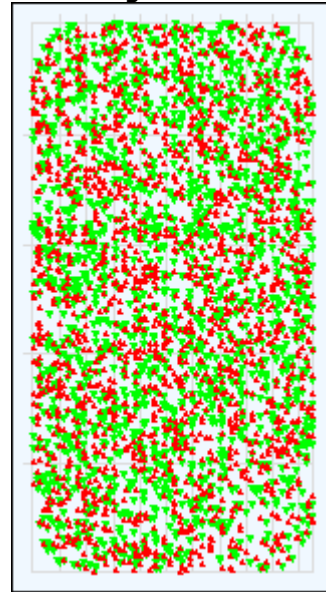

#Up-Regulated:10317 (Red) ; #Down-Regulated:10857 (Green)

▲ Up-Regulated □ Down-Regulated

**LogRatio Versus Log Processed Signal**

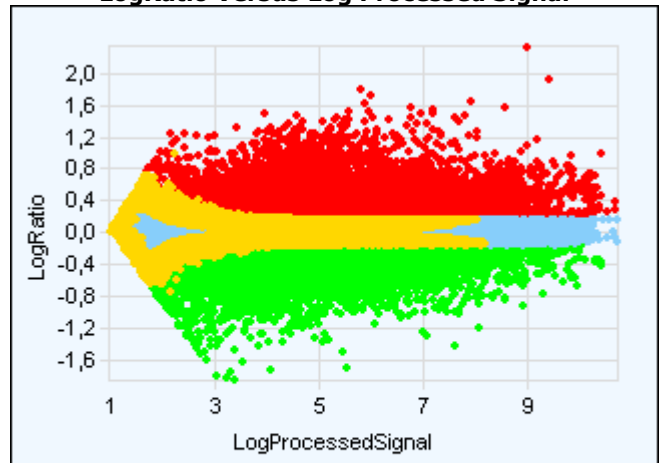

- Significantly down regulated
- Significantly up regulated
- Used to normalize
- Not differentially expressed

### Agilent SpikeIns Signal Statistics

| Probe Name      | Exp   | Obs   | SD   | S/N  |
|-----------------|-------|-------|------|------|
| (+)E1A_r60_n9   | -1.00 | 0.14  | 0.10 | 1.38 |
| (+)E1A_r60_a107 | -0.48 | 0.26  | 0.09 | 3.01 |
| (+)E1A_r60_a135 | -0.48 | 0.14  | 0.13 | 1.08 |
| (+)E1A_r60_n11  | -0.48 | 0.26  | 0.09 | 2.87 |
| (+)E1A_r60_1    | 0.00  | -0.07 | 0.10 | 0.68 |
| (+)E1A_r60_a20  | 0.00  | 0.17  | 0.08 | 2.16 |
| (+)E1A_r60_3    | 0.48  | 0.09  | 0.08 | 1.15 |
| (+)E1A_r60_a104 | 0.48  | 0.21  | 0.12 | 1.72 |
| (+)E1A_r60_a97  | 0.48  | 0.24  | 0.12 | 1.95 |
| (+)E1A_r60_a22  | 1.00  | 0.19  | 0.06 | 3.16 |

### Agilent SpikeIns: % CV of Average BG Sub Signal

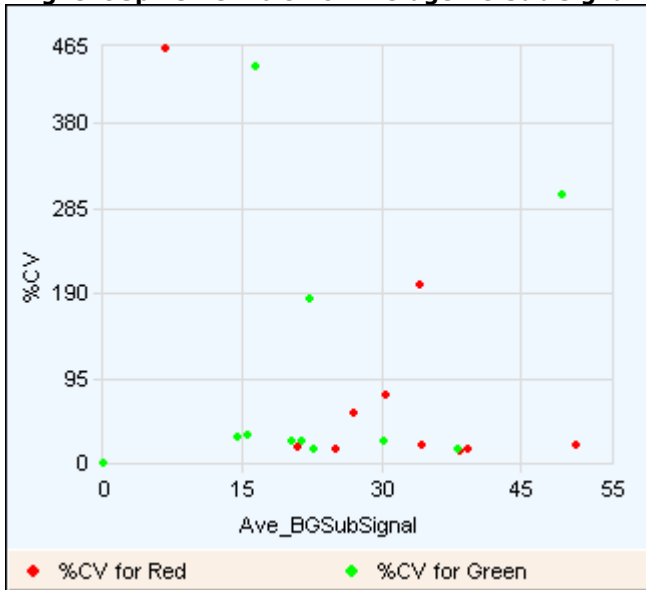

Median %CV: -1.00%(Red); -1.00%(Green)

### Agilent SpikeIns: Expected LogRatio Vs Observed LogRatio

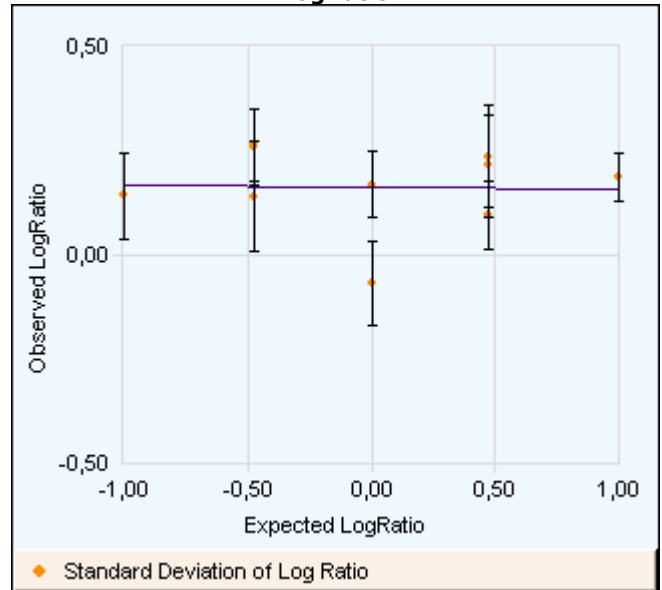

Y-Intercept = 0.165 ; Slope = -0.004 ; R<sup>2</sup> = 0.000

**QC Report - Agilent Technologies : 2 Color Gene Expression**

|            |                                     |                        |                          |
|------------|-------------------------------------|------------------------|--------------------------|
| Date       | Thursday, April 16, 2015 - 09:42    | BG Method              | No Background            |
| Image      | US12302316_251485079962_S01_H [1_4] | Background Detrend     | On(FeatNCRRange, LoPass) |
| Protocol   | GE2-v5_95_Feb07 (Read Only)         | Multiplicative Detrend | True                     |
| User Name  | bennis                              | Dye Norm               | Linear Lowess            |
| Grid       | 014850_D_20070207                   | Linear DyeNorm Factor  | 1.84(Red) 1.41(Green)    |
| FE Version | 9.5.3.1                             | Additive Error         | 4(Red)4(Green)           |
|            |                                     | Saturation Value       | 591262 (r), 583338 (g)   |

**Spot Finding of the Four Corners of the Array**

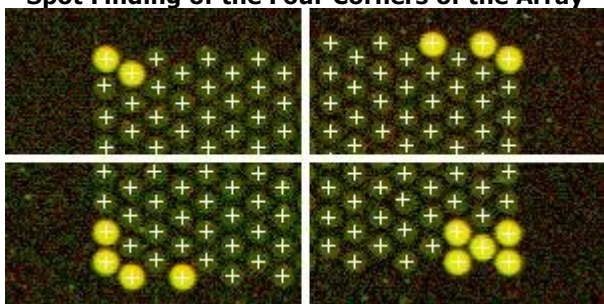

**Grid Normal**

| Feature | Local Background |       |
|---------|------------------|-------|
|         | Red              | Green |

|             | Red | Green | Red  | Green |
|-------------|-----|-------|------|-------|
| Non Uniform | 7   | 13    | 120  | 13    |
| Population  | 92  | 78    | 1504 | 852   |

**Spatial Distribution of All Outliers on the Array**  
532 rows x 85 columns

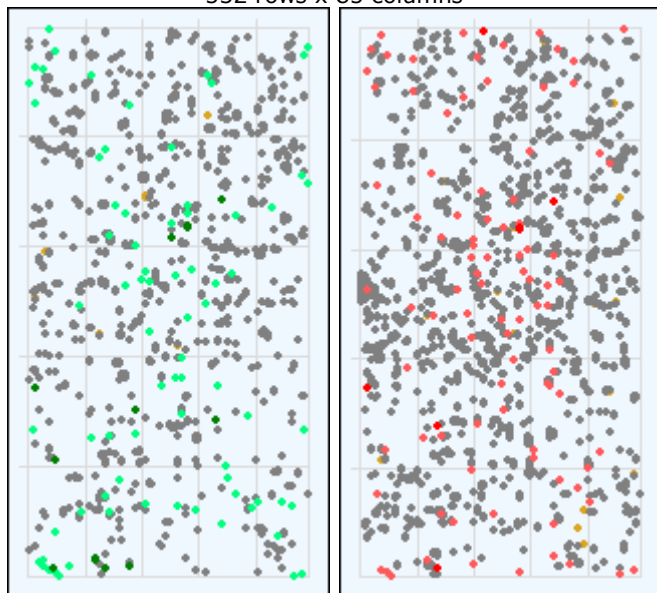

# FeatureNonUnif (Red or Green) = 16(0.04%)

# GeneNonUnif (Red or Green) = 15 (0.037 %)

- BG NonUniform      ● BG Population
- Red FeaturePopulation      ● Red Feature NonUniform
- Green FeaturePopulation      ● Green Feature NonUniform

**Negative Control Stats**

Red                      Green

|                     |       |       |
|---------------------|-------|-------|
| Average Net Signals | 35.62 | 44.19 |
| StdDev Net Signals  | 2.21  | 2.23  |

**Net Signal Statistics**

**Agilent SpikeIns:**

Red                      Green

|                      | Red | Green |
|----------------------|-----|-------|
| # Saturated Features | 0   | 0     |
| 99% of Sig. Distrib. | 73  | 77    |
| 50% of Sig. Distrib. | 46  | 56    |
| 1% of Sig. Distrib.  | 36  | 45    |

**Non-Control probes:**

Red                      Green

|                      | Red   | Green |
|----------------------|-------|-------|
| # Saturated Features | 0     | 0     |
| 99% of Sig. Distrib. | 78521 | 57539 |
| 50% of Sig. Distrib. | 303   | 524   |
| 1% of Sig. Distrib.  | 38    | 50    |

**Red and Green Background Corrected Signals (Non-Control Inliers)**

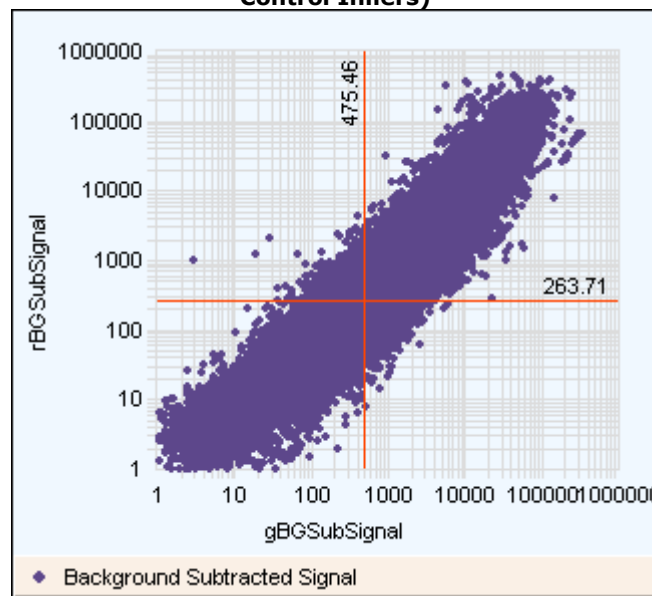

# Features (NonCtrl) with BGSUBSignals < 0: 644 (Red); 244 (Green)

|                       |       |       |
|-----------------------|-------|-------|
| Average BG Sub Signal | -3.56 | -3.97 |
| StdDev BG Sub Signal  | 2.14  | 2.25  |

**Local Bkg (inliers)**

Red Green

|        |       |       |
|--------|-------|-------|
| Number | 43486 | 44156 |
| Avg    | 40.73 | 37.21 |
| SD     | 2.31  | 1.88  |

**Foreground Surface Fit**

Red Green

|           |       |       |
|-----------|-------|-------|
| RMS_Fit   | 0.68  | 0.67  |
| RMS_Resid | 2.32  | 2.62  |
| Avg_Fit   | 55.49 | 64.87 |

**Reproducibility: %CV for Replicated Probes**

Median %CV Signal (inliers)

| Non-Control probes |       | Agilent SpikeIns |       |
|--------------------|-------|------------------|-------|
| Red                | Green | Red              | Green |

|                 |       |       |       |       |
|-----------------|-------|-------|-------|-------|
| BGSubSignal     | 13.43 | 12.93 | -1.00 | -1.00 |
| ProcessedSignal | 4.82  | 5.43  | -1.00 | -1.00 |

**Array Uniformity: LogRatios**

Non-Control Agilent SpikeIns

|                |       |      |
|----------------|-------|------|
| AbsAvgLogRatio | 0.31  | 0.12 |
| AverageS/N     | 21.31 | 0.81 |

**Sensitivity:Agilent SpikeIns - Ratio of Signal to Background for 2 dimmest probes**

(+)E1A\_r60\_n11 (+)E1A\_r60\_a97

| (g) | (r) | (g) | (r) |
|-----|-----|-----|-----|
| 1.4 | 1.3 | 1.0 | 1.1 |

**Spatial Distribution of Significantly Up-Regulated and Down-Regulated Features**

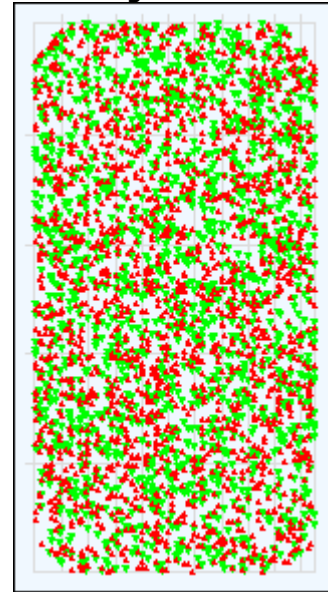

#Up-Regulated:12514 (Red) ; #Down-Regulated:11268 (Green)

▲ Up-Regulated □ Down-Regulated

**LogRatio Versus Log Processed Signal**

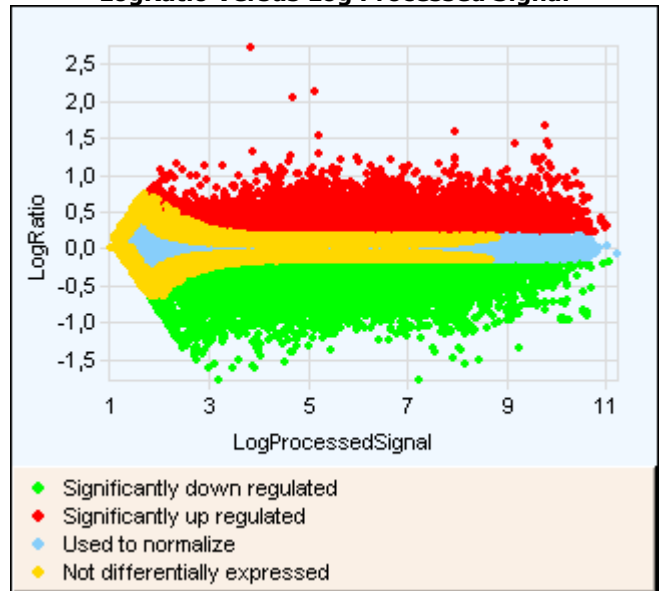

### Agilent SpikeIns Signal Statistics

| Probe Name      | Exp   | Obs   | SD   | S/N  |
|-----------------|-------|-------|------|------|
| (+)E1A_r60_n9   | -1.00 | 0.01  | 0.23 | 0.06 |
| (+)E1A_r60_a107 | -0.48 | 0.12  | 0.18 | 0.65 |
| (+)E1A_r60_a135 | -0.48 | 0.12  | 0.23 | 0.52 |
| (+)E1A_r60_n11  | -0.48 | 0.22  | 0.12 | 1.79 |
| (+)E1A_r60_1    | 0.00  | 0.12  | 0.24 | 0.49 |
| (+)E1A_r60_a20  | 0.00  | 0.25  | 0.40 | 0.62 |
| (+)E1A_r60_3    | 0.48  | 0.09  | 0.14 | 0.66 |
| (+)E1A_r60_a104 | 0.48  | 0.09  | 0.24 | 0.40 |
| (+)E1A_r60_a97  | 0.48  | -0.01 | 0.17 | 0.07 |
| (+)E1A_r60_a22  | 1.00  | 0.21  | 0.07 | 2.80 |

### Agilent SpikeIns: % CV of Average BG Sub Signal

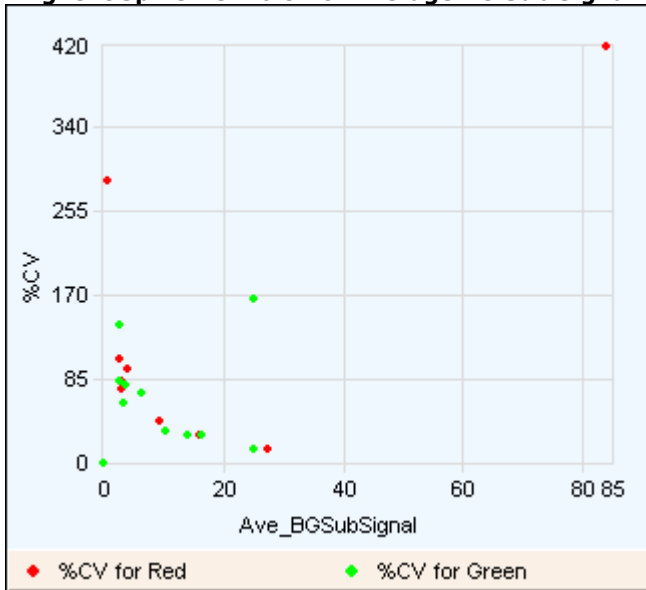

### Agilent SpikeIns: Expected LogRatio Vs Observed LogRatio

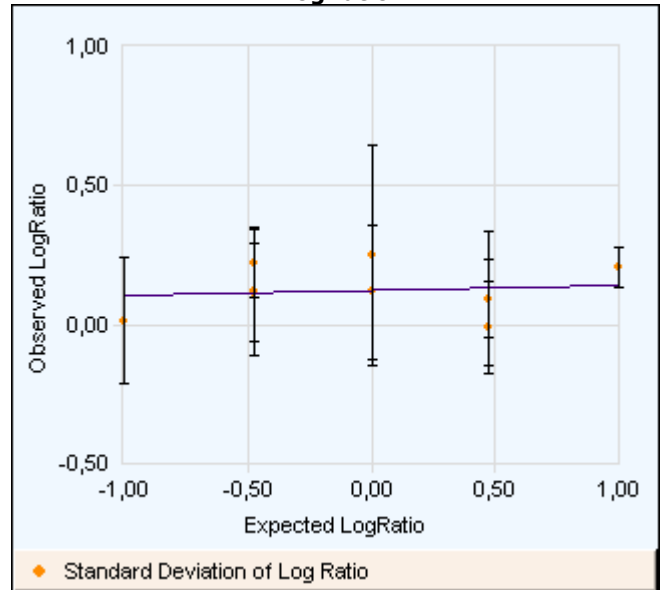

**QC Report - Agilent Technologies : 2 Color Gene Expression**

|            |                                     |                        |                          |
|------------|-------------------------------------|------------------------|--------------------------|
| Date       | Thursday, April 16, 2015 - 09:31    | BG Method              | No Background            |
| Image      | US12302316_251485079962_S01_H [1_1] | Background Detrend     | On(FeatNCRRange, LoPass) |
| Protocol   | GE2-v5_95_Feb07 (Read Only)         | Multiplicative Detrend | True                     |
| User Name  | bennis                              | Dye Norm               | Linear Lowess            |
| Grid       | 014850_D_20070207                   | Linear DyeNorm Factor  | 1.6(Red) 1.84(Green)     |
| FE Version | 9.5.3.1                             | Additive Error         | 4(Red)4(Green)           |
|            |                                     | Saturation Value       | 602397 (r), 583471 (g)   |

**Spot Finding of the Four Corners of the Array**

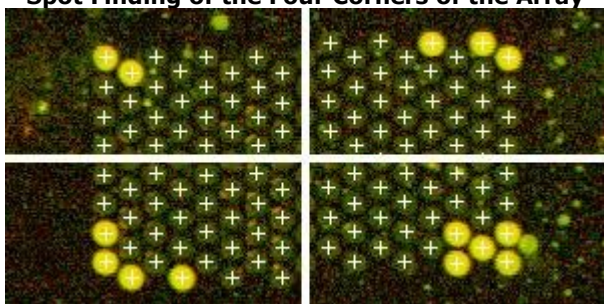

**Grid Normal**

| Feature | Local Background |       |
|---------|------------------|-------|
|         | Red              | Green |

|             | Red | Green | Red  | Green |
|-------------|-----|-------|------|-------|
| Non Uniform | 13  | 14    | 278  | 52    |
| Population  | 114 | 87    | 1919 | 1090  |

**Spatial Distribution of All Outliers on the Array**

532 rows x 85 columns

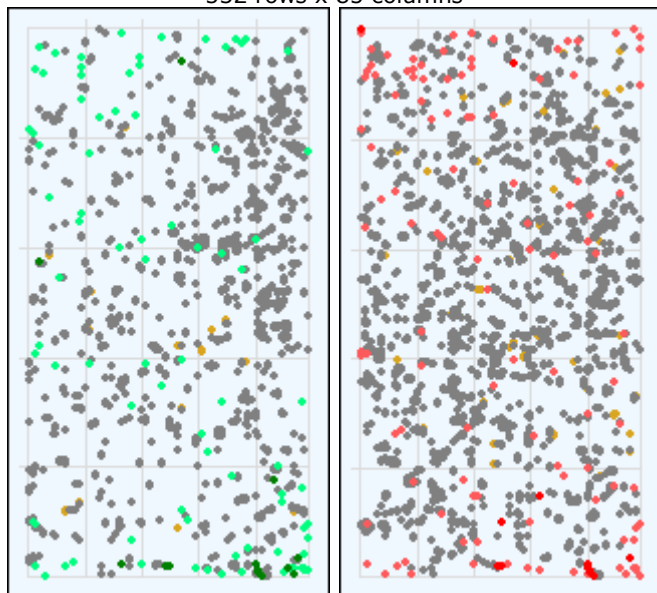

# FeatureNonUnif (Red or Green) = 18(0.04%)

# GeneNonUnif (Red or Green) = 15 (0.037 %)

- BG NonUniform      ● BG Population
- Red FeaturePopulation      ● Red Feature NonUniform
- Green FeaturePopulation      ● Green Feature NonUniform

**Negative Control Stats**

Red                      Green

|                     |       |       |
|---------------------|-------|-------|
| Average Net Signals | 36.40 | 39.09 |
| StdDev Net Signals  | 2.20  | 2.33  |

**Net Signal Statistics**

**Agilent SpikeIns:**

|                      | Red | Green |
|----------------------|-----|-------|
| # Saturated Features | 0   | 0     |
| 99% of Sig. Distrib. | 91  | 77    |
| 50% of Sig. Distrib. | 50  | 49    |
| 1% of Sig. Distrib.  | 37  | 39    |

**Non-Control probes:**

|                      | Red    | Green |
|----------------------|--------|-------|
| # Saturated Features | 2      | 0     |
| 99% of Sig. Distrib. | 109525 | 50344 |
| 50% of Sig. Distrib. | 428    | 477   |
| 1% of Sig. Distrib.  | 40     | 43    |

**Red and Green Background Corrected Signals (Non-Control Inliers)**

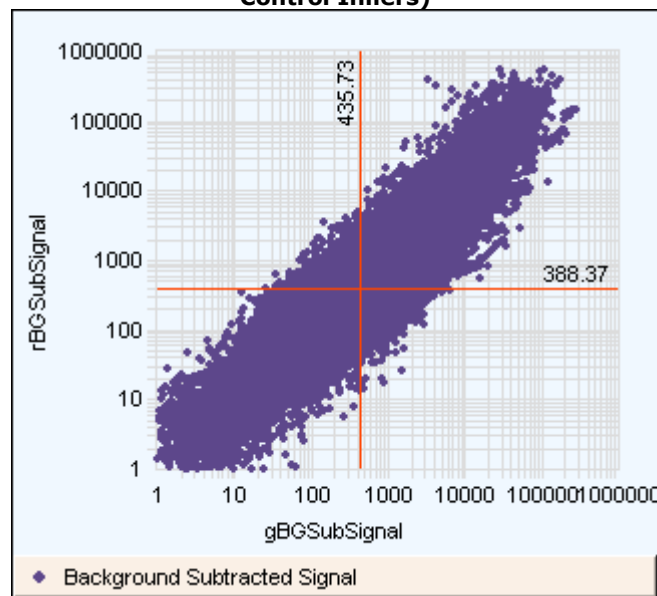

# Features (NonCtrl) with BGSubSignals < 0: 414 (Red); 228 (Green)

|                       |       |       |
|-----------------------|-------|-------|
| Average BG Sub Signal | -3.49 | -2.69 |
| StdDev BG Sub Signal  | 2.17  | 2.06  |

**Local Bkg (inliers)**

Red Green

|        |       |       |
|--------|-------|-------|
| Number | 43034 | 43900 |
| Avg    | 41.53 | 31.75 |
| SD     | 2.66  | 1.86  |

**Foreground Surface Fit**

Red Green

|           |       |       |
|-----------|-------|-------|
| RMS_Fit   | 0.49  | 1.54  |
| RMS_Resid | 2.57  | 2.40  |
| Avg_Fit   | 56.20 | 58.47 |

**Reproducibility: %CV for Replicated Probes**

Median %CV Signal (inliers)

Non-Control probes Agilent SpikeIns

Red Green Red Green

|                 |       |       |       |       |
|-----------------|-------|-------|-------|-------|
| BGSubSignal     | 13.10 | 13.12 | -1.00 | -1.00 |
| ProcessedSignal | 4.59  | 4.70  | -1.00 | -1.00 |

**Array Uniformity: LogRatios**

Non-Control Agilent SpikeIns

|                |       |      |
|----------------|-------|------|
| AbsAvgLogRatio | 0.33  | 0.10 |
| AverageS/N     | 23.96 | 0.93 |

**Sensitivity: Agilent SpikeIns - Ratio of Signal to Background for 2 dimmest probes**

(+)E1A\_r60\_n11 (+)E1A\_r60\_a97

| (g) | (r) | (g) | (r) |
|-----|-----|-----|-----|
| 1.6 | 1.3 | 1.0 | 1.1 |

**Spatial Distribution of Significantly Up-Regulated and Down-Regulated Features**

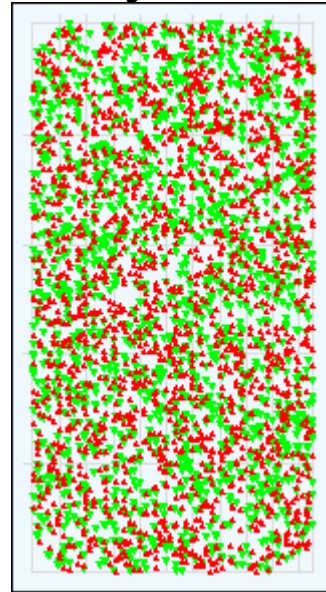

#Up-Regulated:11889 (Red) ; #Down-Regulated:11011 (Green)

▲ Up-Regulated □ Down-Regulated

**LogRatio Versus Log Processed Signal**

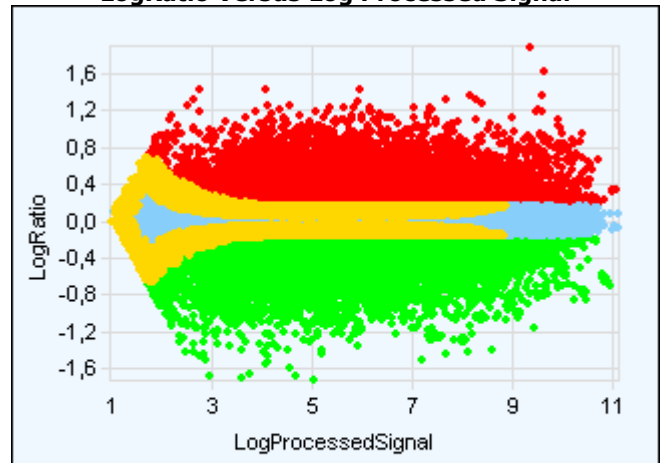

- Significantly down regulated
- Significantly up regulated
- Used to normalize
- Not differentially expressed

### Agilent SpikeIns Signal Statistics

| Probe Name      | Exp   | Obs   | SD   | S/N  |
|-----------------|-------|-------|------|------|
| (+)E1A_r60_n9   | -1.00 | 0.02  | 0.18 | 0.13 |
| (+)E1A_r60_a107 | -0.48 | 0.06  | 0.11 | 0.54 |
| (+)E1A_r60_a135 | -0.48 | 0.05  | 0.19 | 0.28 |
| (+)E1A_r60_n11  | -0.48 | 0.25  | 0.14 | 1.81 |
| (+)E1A_r60_1    | 0.00  | 0.07  | 0.18 | 0.41 |
| (+)E1A_r60_a20  | 0.00  | 0.16  | 0.10 | 1.66 |
| (+)E1A_r60_3    | 0.48  | 0.08  | 0.10 | 0.82 |
| (+)E1A_r60_a104 | 0.48  | 0.03  | 0.23 | 0.12 |
| (+)E1A_r60_a97  | 0.48  | -0.08 | 0.20 | 0.39 |
| (+)E1A_r60_a22  | 1.00  | 0.14  | 0.05 | 3.09 |

### Agilent SpikeIns: % CV of Average BG Sub Signal

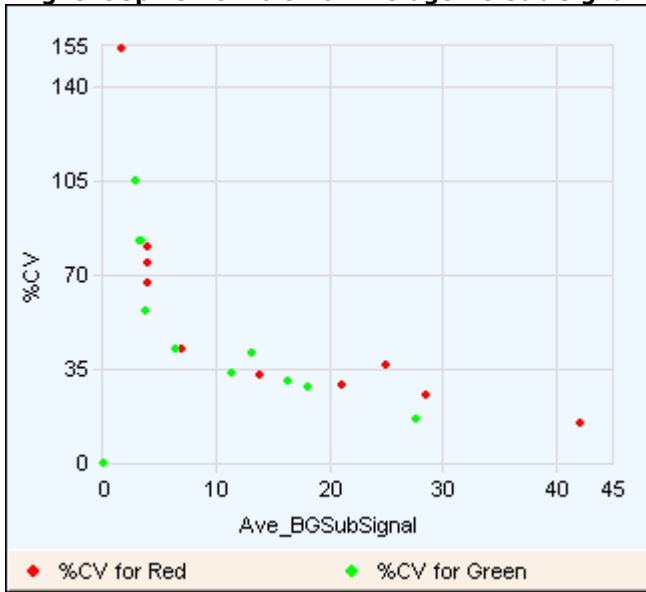

Median %CV: -1.00%(Red); -1.00%(Green)

### Agilent SpikeIns: Expected LogRatio Vs Observed LogRatio

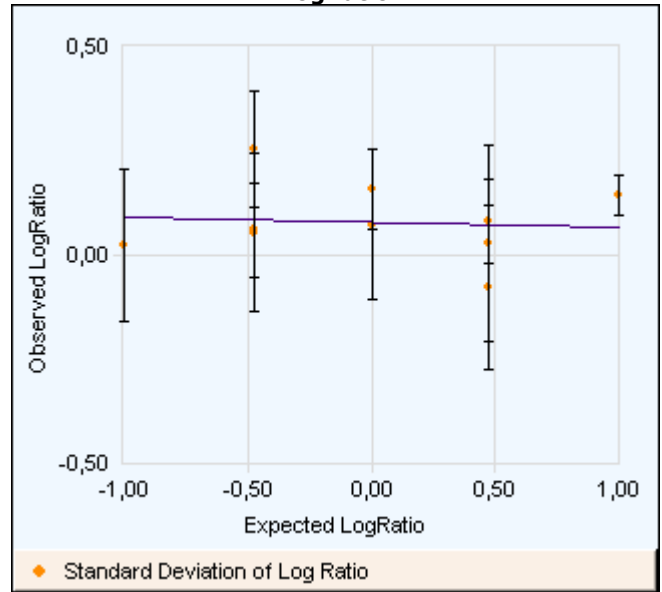

Y-Intercept = 0.080 ; Slope = -0.012 ; R<sup>2</sup> = 0.007



**QC Report - Agilent Technologies : 2 Color Gene Expression**

|            |                                     |                        |                          |
|------------|-------------------------------------|------------------------|--------------------------|
| Date       | Thursday, April 16, 2015 - 09:38    | BG Method              | No Background            |
| Image      | US12302316_251485079962_S01_H [1_3] | Background Detrend     | On(FeatNCRRange, LoPass) |
| Protocol   | GE2-v5_95_Feb07 (Read Only)         | Multiplicative Detrend | True                     |
| User Name  | bennis                              | Dye Norm               | Linear Lowess            |
| Grid       | 014850_D_20070207                   | Linear DyeNorm Factor  | 0.894(Red) 1.37(Green)   |
| FE Version | 9.5.3.1                             | Additive Error         | 10(Red)7(Green)          |
|            |                                     | Saturation Value       | 593071 (r), 583874 (g)   |

**Spot Finding of the Four Corners of the Array**

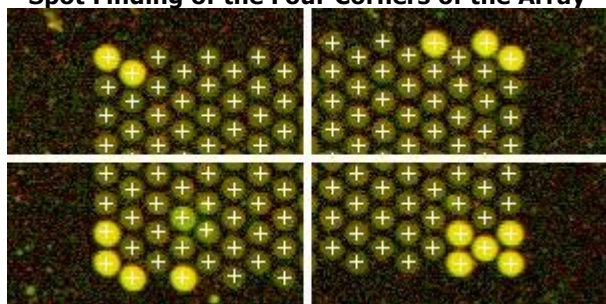

**Grid Normal**

| Feature | Local Background |       |
|---------|------------------|-------|
|         | Red              | Green |

|             | Red | Green | Red  | Green |
|-------------|-----|-------|------|-------|
| Non Uniform | 53  | 58    | 288  | 59    |
| Population  | 184 | 163   | 1742 | 919   |

**Spatial Distribution of All Outliers on the Array**  
532 rows x 85 columns

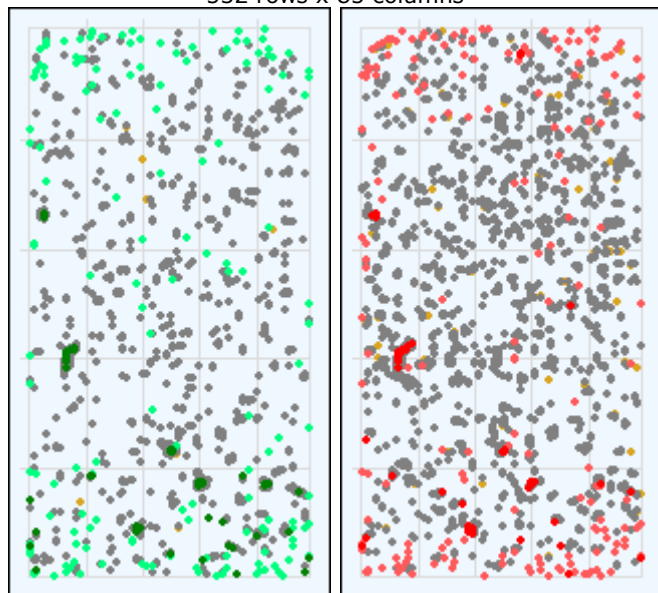

# FeatureNonUnif (Red or Green) = 77(0.17%)

# GeneNonUnif (Red or Green) = 66 (0.161 %)

- BG NonUniform      ● BG Population
- Red FeaturePopulation      ● Red Feature NonUniform
- Green FeaturePopulation      ● Green Feature NonUniform

**Negative Control Stats**

|                     | Red   | Green |
|---------------------|-------|-------|
| Average Net Signals | 86.59 | 66.30 |
| StdDev Net Signals  | 5.33  | 3.29  |

**Net Signal Statistics**

**Agilent SpikeIns:**

|                      | Red | Green |
|----------------------|-----|-------|
| # Saturated Features | 0   | 0     |
| 99% of Sig. Distrib. | 492 | 244   |
| 50% of Sig. Distrib. | 325 | 174   |
| 1% of Sig. Distrib.  | 108 | 78    |

**Non-Control probes:**

|                      | Red    | Green |
|----------------------|--------|-------|
| # Saturated Features | 6      | 0     |
| 99% of Sig. Distrib. | 143310 | 43519 |
| 50% of Sig. Distrib. | 540    | 556   |
| 1% of Sig. Distrib.  | 100    | 78    |

**Red and Green Background Corrected Signals (Non-Control Inliers)**

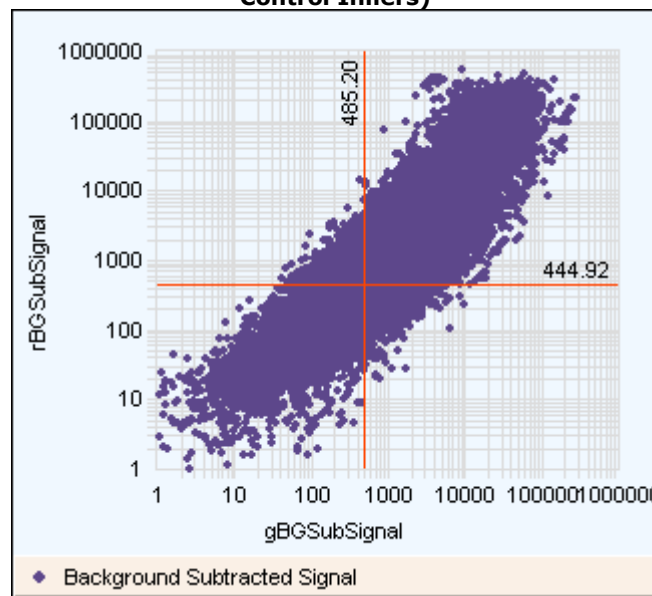

# Features (NonCtrl) with BGSubSignals < 0: 298 (Red); 193 (Green)

|                       |       |       |
|-----------------------|-------|-------|
| Average BG Sub Signal | -7.19 | -4.36 |
| StdDev BG Sub Signal  | 4.93  | 3.48  |

**Local Bkg (inliers)**

Red Green

|        |       |       |
|--------|-------|-------|
| Number | 43202 | 44087 |
| Avg    | 42.88 | 36.48 |
| SD     | 2.83  | 1.83  |

**Foreground Surface Fit**

Red Green

|           |        |       |
|-----------|--------|-------|
| RMS_Fit   | 3.95   | 3.40  |
| RMS_Resid | 10.97  | 5.37  |
| Avg_Fit   | 110.69 | 87.54 |

**Reproducibility: %CV for Replicated Probes**

Median %CV Signal (inliers)

Non-Control probes Agilent SpikeIns

Red Green Red Green

|                 |       |       |       |       |
|-----------------|-------|-------|-------|-------|
| BGSubSignal     | 11.30 | 11.04 | 9.27  | 8.67  |
| ProcessedSignal | 5.64  | 5.37  | 15.85 | 12.36 |

**Array Uniformity: LogRatios**

Non-Control Agilent SpikeIns

|                |       |      |
|----------------|-------|------|
| AbsAvgLogRatio | 0.36  | 0.22 |
| AverageS/N     | 21.49 | 6.29 |

**Sensitivity:Agilent SpikeIns - Ratio of Signal to Background for 2 dimmest probes**

(+)E1A\_r60\_n11 (+)E1A\_r60\_a97

| (g) | (r) | (g) | (r) |
|-----|-----|-----|-----|
| 3.7 | 2.6 | 3.8 | 2.6 |

**Spatial Distribution of Significantly Up-Regulated and Down-Regulated Features**

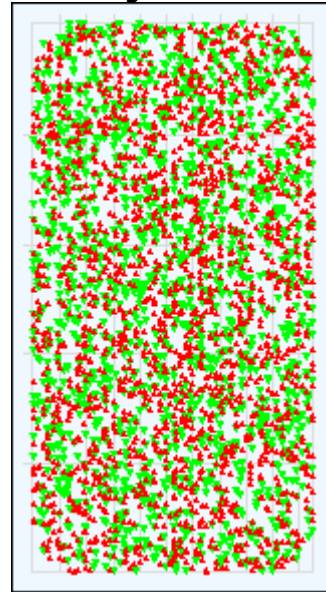

#Up-Regulated:12872 (Red) ; #Down-Regulated:11382 (Green)

▲ Up-Regulated □ Down-Regulated

**LogRatio Versus Log Processed Signal**

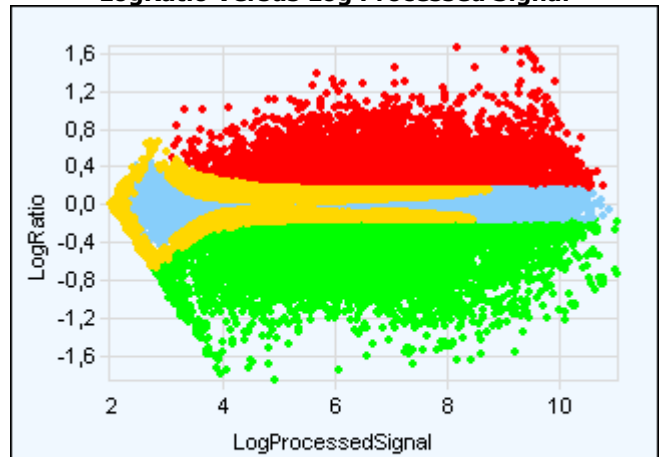

- Significantly down regulated
- Significantly up regulated
- Used to normalize
- Not differentially expressed

### Agilent SpikeIns Signal Statistics

| Probe Name      | Exp   | Obs  | SD   | S/N   |
|-----------------|-------|------|------|-------|
| (+)E1A_r60_n9   | -1.00 | 0.21 | 0.09 | 2.31  |
| (+)E1A_r60_a107 | -0.48 | 0.26 | 0.03 | 9.80  |
| (+)E1A_r60_a135 | -0.48 | 0.21 | 0.03 | 6.33  |
| (+)E1A_r60_n11  | -0.48 | 0.23 | 0.11 | 2.03  |
| (+)E1A_r60_1    | 0.00  | 0.06 | 0.17 | 0.35  |
| (+)E1A_r60_a20  | 0.00  | 0.30 | 0.03 | 9.79  |
| (+)E1A_r60_3    | 0.48  | 0.15 | 0.09 | 1.58  |
| (+)E1A_r60_a104 | 0.48  | 0.26 | 0.02 | 12.26 |
| (+)E1A_r60_a97  | 0.48  | 0.27 | 0.03 | 10.53 |
| (+)E1A_r60_a22  | 1.00  | 0.23 | 0.03 | 7.87  |

### Agilent SpikeIns: % CV of Average BG Sub Signal

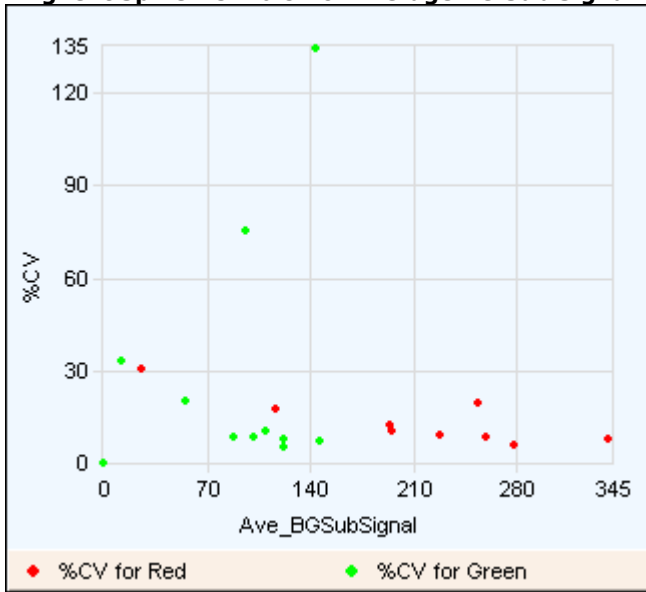

### Agilent SpikeIns: Expected LogRatio Vs Observed LogRatio

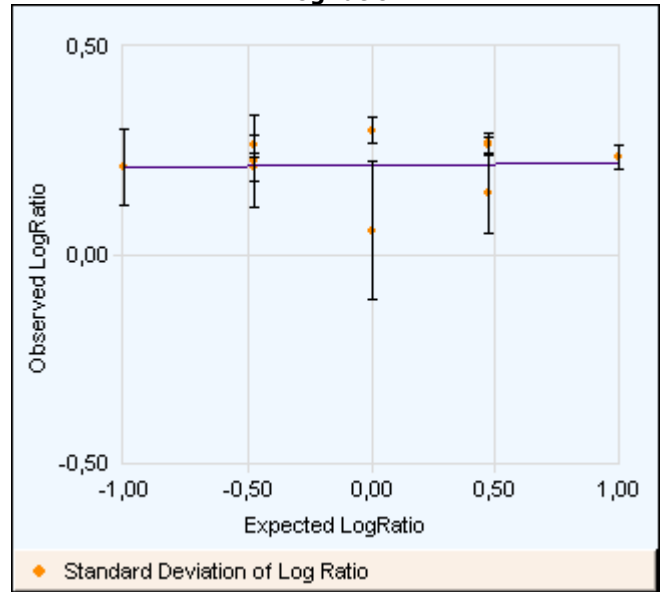

**QC Report - Agilent Technologies : 2 Color Gene Expression**

|            |                                     |                        |                          |
|------------|-------------------------------------|------------------------|--------------------------|
| Date       | Thursday, April 16, 2015 - 11:22    | BG Method              | No Background            |
| Image      | US12302316_251485079963_S01_H [1_1] | Background Detrend     | On(FeatNCRRange, LoPass) |
| Protocol   | GE2-v5_95_Feb07 (Read Only)         | Multiplicative Detrend | True                     |
| User Name  | bennis                              | Dye Norm               | Linear Lowess            |
| Grid       | 014850_D_20070207                   | Linear DyeNorm Factor  | 5.11(Red)0.894(Green)    |
| FE Version | 9.5.3.1                             | Additive Error         | 12(Red)2(Green)          |
|            |                                     | Saturation Value       | 578643 (r), 588759 (g)   |

**Spot Finding of the Four Corners of the Array**

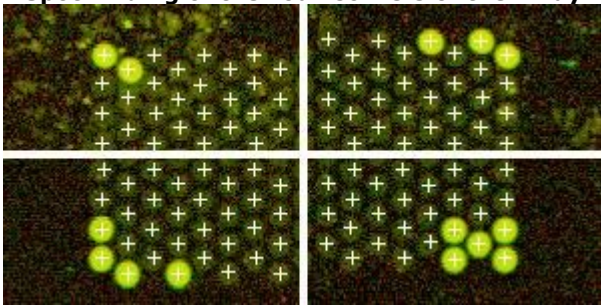

**Grid Normal**

| Feature | Local Background |       |
|---------|------------------|-------|
|         | Red              | Green |

|             | Red | Green | Red | Green |
|-------------|-----|-------|-----|-------|
| Non Uniform | 50  | 62    | 40  | 275   |
| Population  | 163 | 183   | 839 | 1169  |

**Spatial Distribution of All Outliers on the Array**  
532 rows x 85 columns

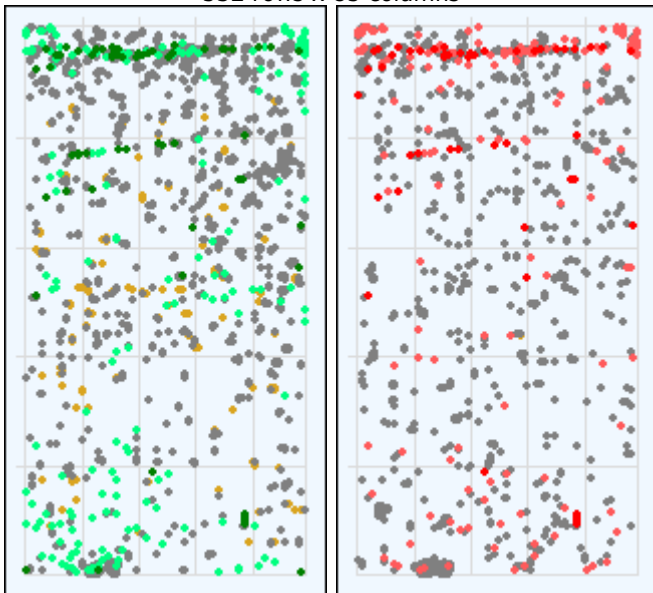

# FeatureNonUnif (Red or Green) = 72(0.16%)

# GeneNonUnif (Red or Green) = 57 (0.139 %)

- BG NonUniform      ● BG Population
- Red FeaturePopulation      ● Red Feature NonUniform
- Green FeaturePopulation      ● Green Feature NonUniform

**Negative Control Stats**

Red                      Green

|                     |       |       |
|---------------------|-------|-------|
| Average Net Signals | 34.51 | 31.87 |
| StdDev Net Signals  | 2.63  | 3.13  |

**Net Signal Statistics**

**Agilent SpikeIns:**

Red                      Green

|                      | Red | Green |
|----------------------|-----|-------|
| # Saturated Features | 0   | 0     |
| 99% of Sig. Distrib. | 53  | 80    |
| 50% of Sig. Distrib. | 38  | 43    |
| 1% of Sig. Distrib.  | 30  | 32    |

**Non-Control probes:**

Red                      Green

|                      | Red   | Green |
|----------------------|-------|-------|
| # Saturated Features | 0     | 0     |
| 99% of Sig. Distrib. | 14688 | 65019 |
| 50% of Sig. Distrib. | 91    | 432   |
| 1% of Sig. Distrib.  | 33    | 35    |

**Red and Green Background Corrected Signals (Non-Control Inliers)**

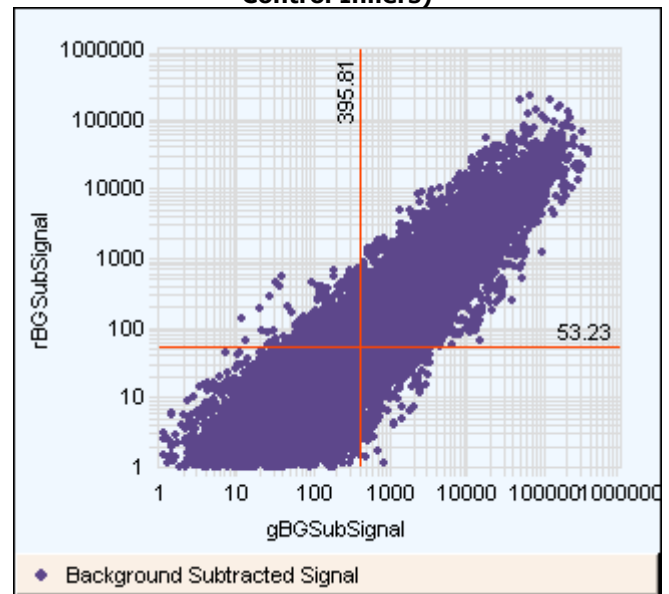

# Features (NonCtrl) with BGSubSignals < 0: 3318 (Red); 529 (Green)

|                       |       |       |
|-----------------------|-------|-------|
| Average BG Sub Signal | -2.95 | -3.99 |
| StdDev BG Sub Signal  | 2.12  | 2.09  |

**Local Bkg (inliers)**

Red Green

|        |       |       |
|--------|-------|-------|
| Number | 44175 | 43701 |
| Avg    | 42.42 | 29.83 |
| SD     | 2.25  | 1.99  |

**Foreground Surface Fit**

Red Green

|           |       |       |
|-----------|-------|-------|
| RMS_Fit   | 1.79  | 2.59  |
| RMS_Resid | 2.36  | 2.63  |
| Avg_Fit   | 54.58 | 53.09 |

**Reproducibility: %CV for Replicated Probes**

Median %CV Signal (inliers)

| Non-Control probes |       | Agilent SpikeIns |       |
|--------------------|-------|------------------|-------|
| Red                | Green | Red              | Green |
|                    |       |                  |       |

|                 |       |      |       |       |
|-----------------|-------|------|-------|-------|
| BGSubSignal     | 21.39 | 7.28 | -1.00 | -1.00 |
| ProcessedSignal | 7.04  | 3.78 | -1.00 | -1.00 |

**Array Uniformity: LogRatios**

Non-Control Agilent SpikeIns

|                |       |      |
|----------------|-------|------|
| AbsAvgLogRatio | 0.32  | 0.03 |
| AverageS/N     | 10.04 | 0.23 |

**Sensitivity:Agilent SpikeIns - Ratio of Signal to Background for 2 dimmest probes**

(+)E1A\_r60\_n11 (+)E1A\_r60\_a97

| (g) | (r) | (g) | (r) |
|-----|-----|-----|-----|
| 1.0 | 1.4 | 0.9 | 1.0 |

**Spatial Distribution of Significantly Up-Regulated and Down-Regulated Features**

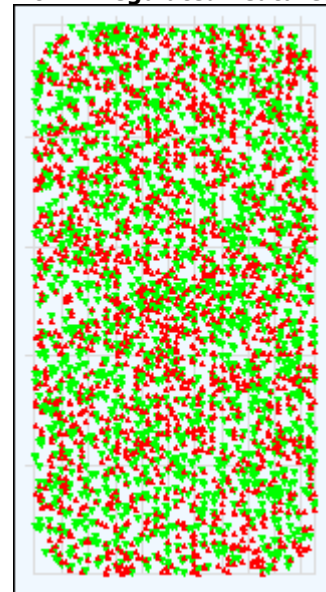

#Up-Regulated:10268 (Red) ; #Down-Regulated:10846 (Green)

▲ Up-Regulated □ Down-Regulated

**LogRatio Versus Log Processed Signal**

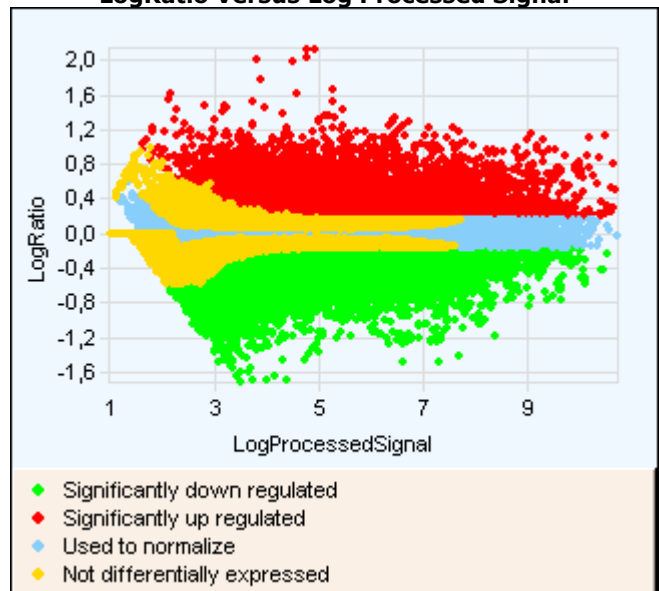

### Agilent SpikeIns Signal Statistics

| Probe Name      | Exp   | Obs   | SD   | S/N  |
|-----------------|-------|-------|------|------|
| (+)E1A_r60_n9   | -1.00 | 0.03  | 0.10 | 0.25 |
| (+)E1A_r60_a107 | -0.48 | -0.01 | 0.12 | 0.07 |
| (+)E1A_r60_a135 | -0.48 | 0.02  | 0.12 | 0.18 |
| (+)E1A_r60_n11  | -0.48 | -0.03 | 0.17 | 0.16 |
| (+)E1A_r60_1    | 0.00  | 0.03  | 0.13 | 0.25 |
| (+)E1A_r60_a20  | 0.00  | 0.04  | 0.23 | 0.17 |
| (+)E1A_r60_3    | 0.48  | -0.05 | 0.16 | 0.30 |
| (+)E1A_r60_a104 | 0.48  | 0.01  | 0.05 | 0.18 |
| (+)E1A_r60_a97  | 0.48  | 0.01  | 0.07 | 0.18 |
| (+)E1A_r60_a22  | 1.00  | 0.10  | 0.19 | 0.51 |

### Agilent SpikeIns: % CV of Average BG Sub Signal

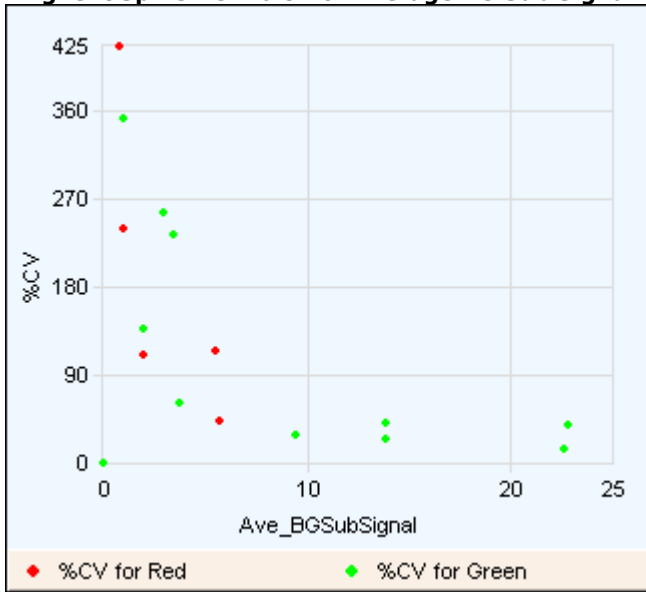

Median %CV: -1.00%(Red); -1.00%(Green)

### Agilent SpikeIns: Expected LogRatio Vs Observed LogRatio

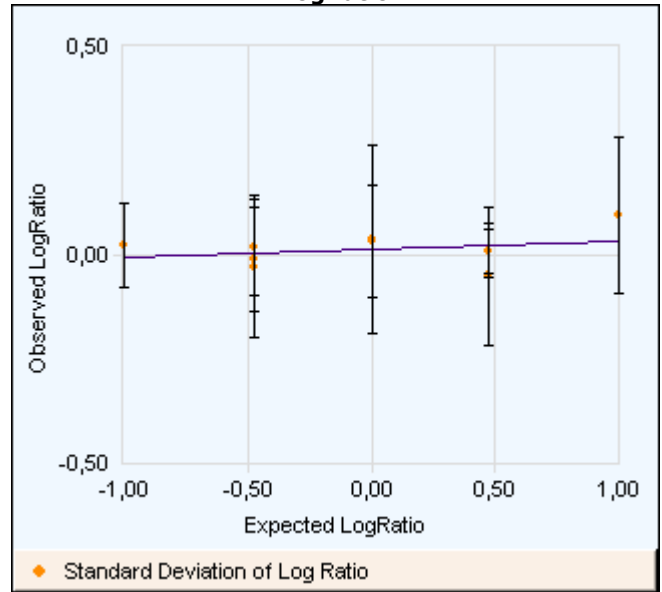

Y-Intercept = 0.015 ; Slope = 0.019 ; R<sup>2</sup> = 0.086
