# Supplementary material for: Comparative gene expression study and pathway analysis of the human iris- and the retinal pigment epithelium
Source: PubMed Central journal article supplement (PMC5565104; doi:10.1371/journal.pone.0182983), 2017-08-21

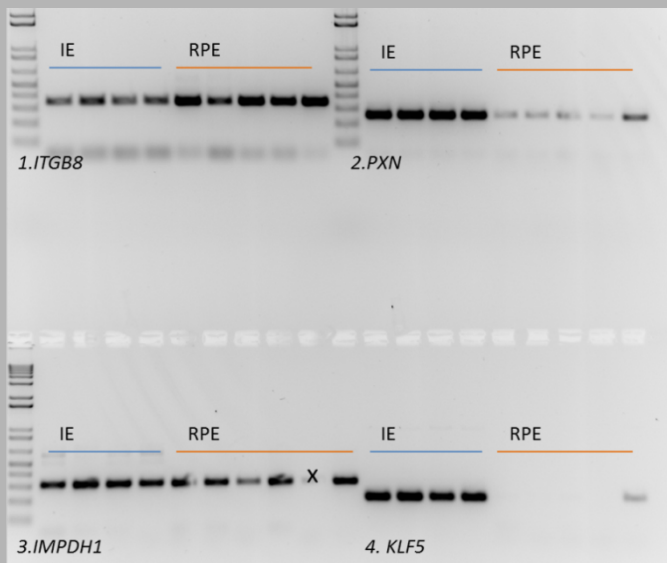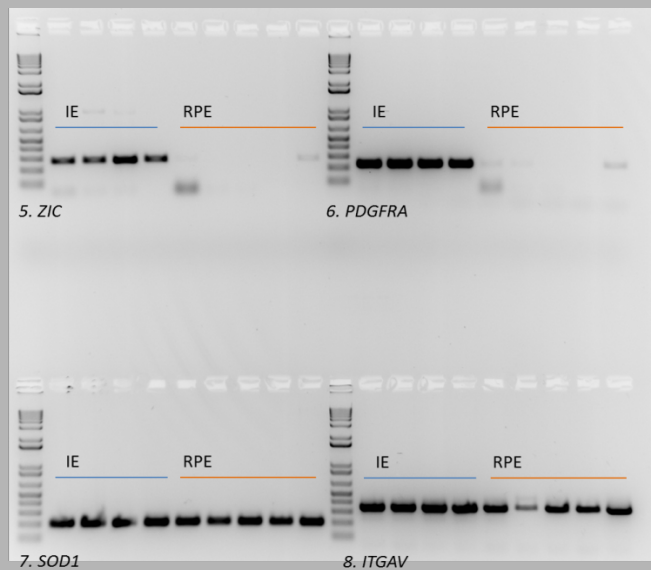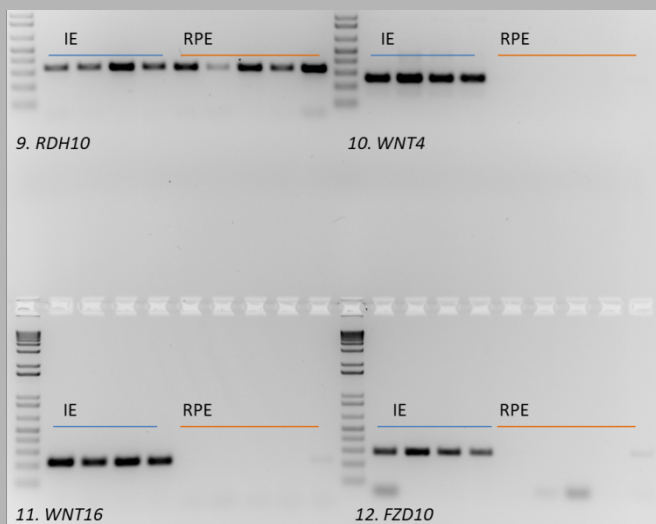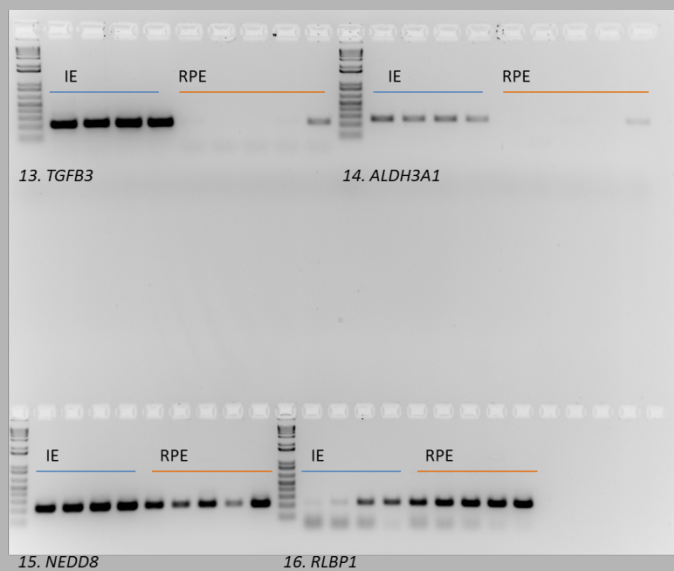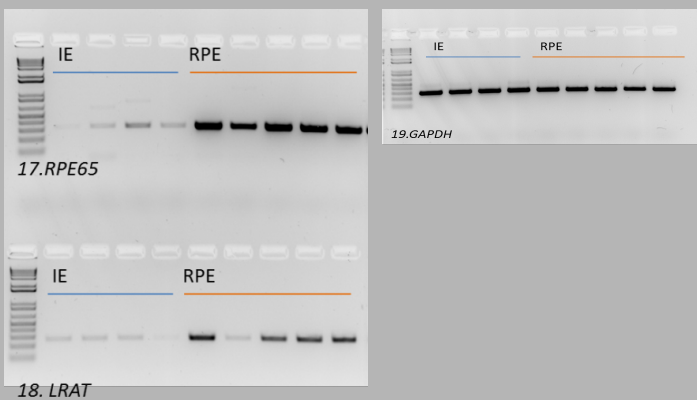

Supplement: pone.0182983.s007.pdf [file pone.0182983.s007.pdf]
